# Supplementary material for: Antimicrobial bianthrones from the crinoid Heterometra sp.
Source: Royal Society of Chemistry journal article supplement (doi:10.1039/d4ra05594b), 2024-01-01
Supplement: d4ra05594b1.pdf [file d4ra05594b1.pdf]

# Supplementary Information

## for

### Antimicrobial bianthrone from the crinoid *Heterometra* sp.

Vítor F. Freire,<sup>a</sup> Lucero Martínez-Fructuoso,<sup>a</sup> Rohitesh Kumar,<sup>b</sup> Rhone K. Akee,<sup>b</sup> Christopher C. Thornburg,<sup>b</sup> Susan Ensel,<sup>b,c</sup> Ekene Okoroafor,<sup>b</sup> Jason R. Evans,<sup>a</sup> Dongdong Wang,<sup>d</sup> Brian D. Peyser,<sup>a</sup> Tanja Grkovic,<sup>\*a,d</sup> Barry R. O'Keefe<sup>\*a,d</sup>

<sup>a</sup>Natural Products Branch, Developmental Therapeutic Program, Division of Cancer Treatment and Diagnosis, National Cancer Institute, Frederick, Maryland 21702-1201, United States

<sup>b</sup>Natural Products Support Group, Leidos Biomedical Research, Inc., Frederick National Laboratory for Cancer Research, Frederick, Maryland 21702-1201, United States

<sup>c</sup>Department of Chemistry and Physics, Hood College, Frederick, Maryland 21701-8599, United States

<sup>d</sup>Molecular Targets Program, Center for Cancer Research, National Cancer Institute, Frederick, Maryland 21702-1201, United States

#### LIST OF FIGURES

|                                                                                                                                                                                                                                     |    |
|-------------------------------------------------------------------------------------------------------------------------------------------------------------------------------------------------------------------------------------|----|
| <b>Figure S1.</b> Screening of subfractions generated for the an antimicrobial campaign between NIAID and NCI. <sup>1</sup> .....                                                                                                   | 5  |
| <b>Figure S2.</b> HRESIMS spectrum of crinemodin bianthrone ( <b>1</b> ). .....                                                                                                                                                     | 6  |
| <b>Figure S3.</b> Expansion of HRESIMS spectrum of crinemodin bianthrone ( <b>1</b> ). .....                                                                                                                                        | 6  |
| <b>Figure S4.</b> 600 MHz <sup>1</sup> H NMR spectrum of crinemodin bianthrone ( <b>1</b> ) in MeOH- <i>d</i> <sub>4</sub> . The spectrum was acquired over 4 scans using the standard zg30 Bruker pulse sequence. 7                |    |
| <b>Figure S5.</b> Expansion of 600 MHz <sup>1</sup> H NMR spectrum of crinemodin bianthrone ( <b>1</b> ) in MeOH- <i>d</i> <sub>4</sub> . The spectrum was acquired over 4 scans using the standard zg30 Bruker pulse sequence..... | 8  |
| <b>Figure S6.</b> Expansion of 600 MHz <sup>1</sup> H NMR spectrum of crinemodin bianthrone ( <b>1</b> ) in MeOH- <i>d</i> <sub>4</sub> . The spectrum was acquired over 4 scans using the standard zg30 Bruker pulse sequence..... | 9  |
| <b>Figure S7.</b> Expansion of 600 MHz <sup>1</sup> H NMR spectrum of crinemodin bianthrone ( <b>1</b> ) in MeOH- <i>d</i> <sub>4</sub> . The spectrum was acquired over 4 scans using the standard zg30 Bruker pulse sequence..... | 10 |

|                                                                                                                                                                                                                                                         |    |
|---------------------------------------------------------------------------------------------------------------------------------------------------------------------------------------------------------------------------------------------------------|----|
| <b>Figure S8.</b> 151 MHz $^{13}\text{C}$ NMR spectrum of crinemodin bianthrone ( <b>1</b> ) in MeOH- $d_4$ . The spectrum was acquired over 10000 scans using the standard zgpg30 Bruker pulse sequence.....                                           | 11 |
| <b>Figure S9.</b> $^1\text{H}$ - $^{13}\text{C}$ HSQC NMR spectrum of crinemodin bianthrone ( <b>1</b> ) in MeOH- $d_4$ . The spectrum was acquired over 80 scans at 1024 t1 increments using the standard hsqcedetgpsisp2.3 Bruker pulse sequence..... | 12 |
| <b>Figure S10.</b> $^1\text{H}$ - $^1\text{H}$ COSY NMR spectrum of crinemodin bianthrone ( <b>1</b> ) in MeOH- $d_4$ . The spectrum was acquired over 8 scans at 1024 t1 increments using the standard cosygpppqf Bruker pulse sequence. ....          | 13 |
| <b>Figure S11.</b> $^1\text{H}$ - $^{13}\text{C}$ HMBC NMR spectrum of crinemodin bianthrone ( <b>1</b> ) in MeOH- $d_4$ . The spectrum was acquired over 296 scans at 2048 t1 increments using the standard hmbcetgpl3nd Bruker pulse sequence. ....   | 14 |
| <b>Figure S12.</b> FTIR spectrum of crinemodin bianthrone ( <b>1</b> ).....                                                                                                                                                                             | 15 |
| <b>Figure S13.</b> HRESIMS spectrum of 1"-dehydrocrinemodin bianthrone ( <b>2</b> ).....                                                                                                                                                                | 16 |
| <b>Figure S14.</b> Expansion of HRESIMS spectrum of 1"-dehydrocrinemodin bianthrone ( <b>2</b> ).<br>.....                                                                                                                                              | 16 |
| <b>Figure S15.</b> 600 MHz $^1\text{H}$ NMR spectrum of 1"-dehydrocrinemodin bianthrone ( <b>2</b> ) in MeOH- $d_4$ . The spectrum was acquired over 4 scans using the standard zg30 Bruker pulse sequence.....                                         | 16 |
| <b>Figure S16.</b> Expansion of 600 MHz $^1\text{H}$ NMR spectrum of 1"-dehydrocrinemodin bianthrone ( <b>2</b> ) in MeOH- $d_4$ . The spectrum was acquired over 4 scans using the standard zg30 Bruker pulse sequence.....                            | 17 |
| <b>Figure S17.</b> Expansion of 600 MHz $^1\text{H}$ NMR spectrum of 1"-dehydrocrinemodin bianthrone ( <b>2</b> ) in MeOH- $d_4$ . The spectrum was acquired over 4 scans using the standard zg30 Bruker pulse sequence.....                            | 17 |
| <b>Figure S18.</b> Expansion of 600 MHz $^1\text{H}$ NMR spectrum of 1"-dehydrocrinemodin bianthrone ( <b>2</b> ) in MeOH- $d_4$ . The spectrum was acquired over 4 scans using the standard zg30 Bruker pulse sequence.....                            | 18 |
| <b>Figure S19.</b> 151 MHz $^{13}\text{C}$ NMR spectrum of 1"-dehydrocrinemodin bianthrone ( <b>2</b> ) in MeOH- $d_4$ . The spectrum was acquired over 10000 scans using the standard zgpg30 Bruker pulse sequence.....                                | 19 |

|                                                                                                                                                                                                                                                                     |    |
|---------------------------------------------------------------------------------------------------------------------------------------------------------------------------------------------------------------------------------------------------------------------|----|
| <b>Figure S20.</b> $^1\text{H}$ - $^{13}\text{C}$ HSQC NMR spectrum of 1"-dehydrocrinemodin bianthrone ( <b>2</b> ) in MeOH- $d_4$ . The spectrum was acquired over 64 scans at 1024 t1 increments using the standard hsqcedetgpsisp2.3 Bruker pulse sequence. .... | 20 |
| <b>Figure S21.</b> $^1\text{H}$ - $^1\text{H}$ COSY NMR spectrum of 1"-dehydrocrinemodin bianthrone ( <b>2</b> ) in MeOH- $d_4$ . The spectrum was acquired over 4 scans at 1024 t1 increments using the standard cosygppppqf Bruker pulse sequence. ....           | 21 |
| <b>Figure S22.</b> $^1\text{H}$ - $^{13}\text{C}$ HMBC NMR spectrum of 1"-dehydrocrinemodin bianthrone ( <b>2</b> ) in MeOH- $d_4$ . The spectrum was acquired over 296 scans at 2048 t1 increments using the standard hmbcetgpl3nd Bruker pulse sequence. ....     | 22 |
| <b>Figure S23.</b> $^1\text{H}$ - $^{13}\text{C}$ LRHSQMBC NMR spectrum of 1"-dehydrocrinemodin bianthrone ( <b>2</b> ) in MeOH- $d_4$ . The spectrum was acquired over 300 scans at 2048 t1 increments using the js_lrhsqmbc_final pulse sequence.....             | 23 |
| <b>Figure S24.</b> FTIR spectrum for 1"-dehydrocrinemodin bianthrone ( <b>2</b> ). ....                                                                                                                                                                             | 24 |
| <b>Figure S25.</b> HRESIMS spectrum of 1"-hydroxycrinemodin bianthrone ( <b>3</b> ). ....                                                                                                                                                                           | 25 |
| <b>Figure S26.</b> Expansion of HRESIMS spectrum of 1"-hydroxycrinemodin bianthrone ( <b>3</b> ).<br>.....                                                                                                                                                          | 25 |
| <b>Figure S27.</b> 600 MHz $^1\text{H}$ NMR spectrum of 1"-hydroxycrinemodin bianthrone ( <b>3</b> ) in MeOH- $d_4$ . The spectrum was acquired over 4 scans using the standard zg30 Bruker pulse sequence.....                                                     | 26 |
| <b>Figure S28.</b> Expansion of 600 MHz $^1\text{H}$ NMR spectrum of 1"-hydroxycrinemodin bianthrone ( <b>3</b> ) in MeOH- $d_4$ . The spectrum was acquired over 4 scans using the standard zg30 Bruker pulse sequence.....                                        | 27 |
| <b>Figure S29.</b> Expansion of 600 MHz $^1\text{H}$ NMR spectrum of 1"-hydroxycrinemodin bianthrone ( <b>3</b> ) in MeOH- $d_4$ . The spectrum was acquired over 4 scans using the standard zg30 Bruker pulse sequence.....                                        | 28 |
| <b>Figure S30.</b> Expansion of 600 MHz $^1\text{H}$ NMR spectrum of 1"-hydroxycrinemodin bianthrone ( <b>3</b> ) in MeOH- $d_4$ . The spectrum was acquired over 4 scans using the standard zg30 Bruker pulse sequence.....                                        | 29 |
| <b>Figure S31.</b> 151 MHz $^{13}\text{C}$ NMR spectrum of 1"-hydroxycrinemodin bianthrone ( <b>3</b> ) in MeOH- $d_4$ . The spectrum was acquired over 12000 scans using the standard zgpg30 Bruker pulse sequence.....                                            | 30 |

|                                                                                                                                                                                                                                                                     |    |
|---------------------------------------------------------------------------------------------------------------------------------------------------------------------------------------------------------------------------------------------------------------------|----|
| <b>Figure S32.</b> $^1\text{H}$ - $^1\text{H}$ COSY NMR spectrum of 1"-hydroxycrinemodin bianthrone ( <b>3</b> ) in MeOH- $d_4$ . The spectrum was acquired over 4 scans at 1024 t1 increments using the standard cosygpppqf Bruker pulse sequence. ....            | 31 |
| <b>Figure S33.</b> $^1\text{H}$ - $^{13}\text{C}$ HSQC NMR spectrum of 1"-hydroxycrinemodin bianthrone ( <b>3</b> ) in MeOH- $d_4$ . The spectrum was acquired over 64 scans at 1024 t1 increments using the standard hsqcedetgpsisp2.3 Bruker pulse sequence. .... | 32 |
| <b>Figure S34.</b> $^1\text{H}$ - $^{13}\text{C}$ HMBC NMR spectrum of 1"-hydroxycrinemodin bianthrone ( <b>3</b> ) in MeOH- $d_4$ . The spectrum was acquired over 240 scans at 2048 t1 increments using the standard hmbcetgpl3nd Bruker pulse sequence. ....     | 33 |
| <b>Figure S35.</b> FTIR spectrum of 1"-hydroxycrinemodin bianthrone ( <b>3</b> ).....                                                                                                                                                                               | 34 |
| <b>Figure S36.</b> ECD spectra overlap of compounds <b>1</b> - <b>3</b> in acetonitrile. ....                                                                                                                                                                       | 34 |
| <b>Figure S37.</b> $^1\text{H}$ NMR spectra of <b>3</b> (in MeOH- $d_4$ ) titration with $\text{D}_2\text{O}$ , from 0 $\mu\text{L}$ (bottom) to 20 $\mu\text{L}$ (top) of $\text{D}_2\text{O}$ . ....                                                              | 35 |
| <b>Figure S38.</b> NCI60 data for crinemodin bianthrone ( <b>1</b> ).....                                                                                                                                                                                           | 36 |
| <b>Figure S39.</b> NCI60 data for 1"-dehydrocrinemodin bianthrone ( <b>2</b> ).....                                                                                                                                                                                 | 37 |
| <b>Figure S40.</b> NCI60 data for 1"-hydroxycrinemodin bianthrone ( <b>3</b> ).....                                                                                                                                                                                 | 38 |

## LIST OF TABLES

|                                                                                                                                                                                                                                                                                                                                                                  |    |
|------------------------------------------------------------------------------------------------------------------------------------------------------------------------------------------------------------------------------------------------------------------------------------------------------------------------------------------------------------------|----|
| <b>Table S1.</b> Reaction rates of <b>3</b> reacted with propionic anhydride using <i>R</i> - or <i>S</i> -HBTM catalysts. The reaction rate was achieved by measuring the peak areas for the fully acylated derivative, using the extracted ion chromatogram (EIC) for the sodiated molecule $[\text{M} + \text{Na}]^+$ at $m/z$ 997.3617 ( $\pm 20$ ppm). .... | 39 |
|------------------------------------------------------------------------------------------------------------------------------------------------------------------------------------------------------------------------------------------------------------------------------------------------------------------------------------------------------------------|----|

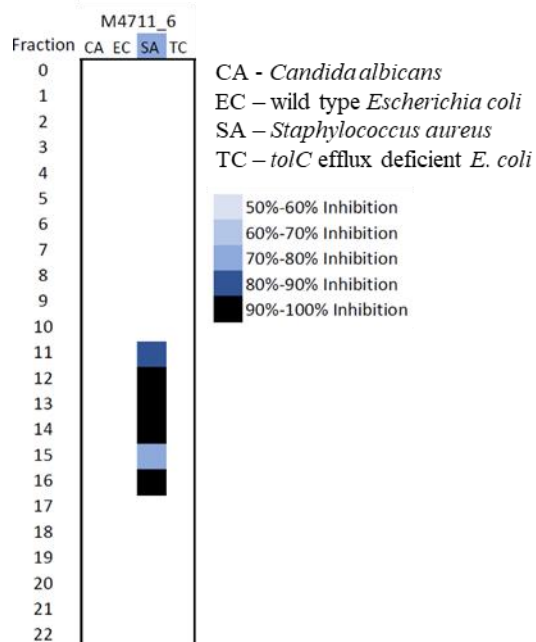

**Figure S1.** Screening of subfractions generated for the antimicrobial campaign between NIAID and NCI.<sup>1</sup>

1. L. Martinez-Fructoso, S. J. R. Arends, V. F. Freire, J. R. Evans, S. DeVries, B. D. Peyser, R. K. Akee, C. C. Thornburg, R. Kumar, S. Ensel, G. M. Morgan, G. D. McConachie, N. Veeder, L. R. Duncan, T. Grkovic and B. R. O'Keefe, *ACS Infect. Dis.*, 2023, **9**, 1245-1256.

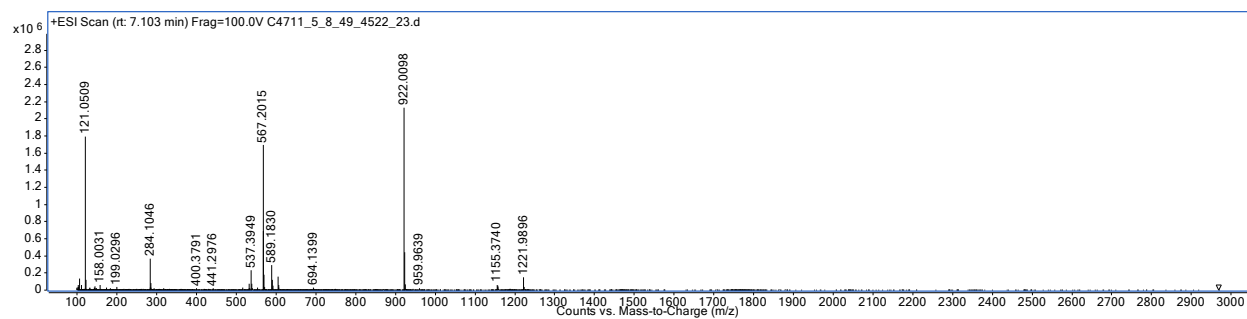

**Figure S2.** HRESIMS spectrum of crinemodin bianthrone (1).

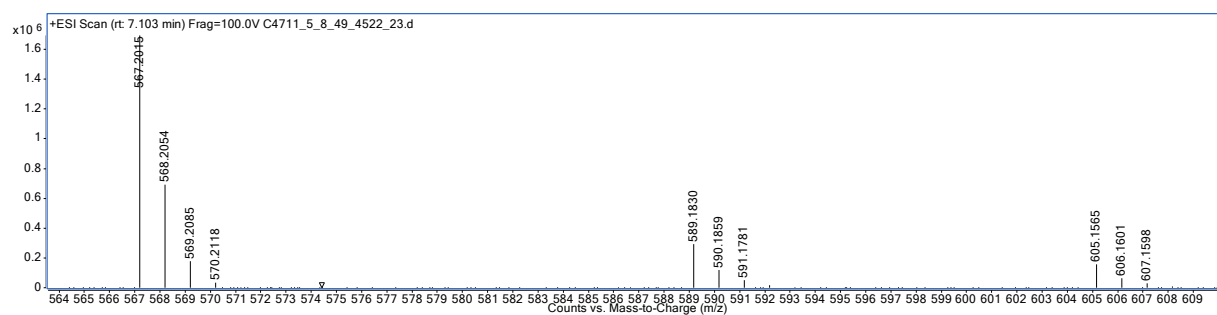

**Figure S3.** Expansion of HRESIMS spectrum of crinemodin bianthrone (1).

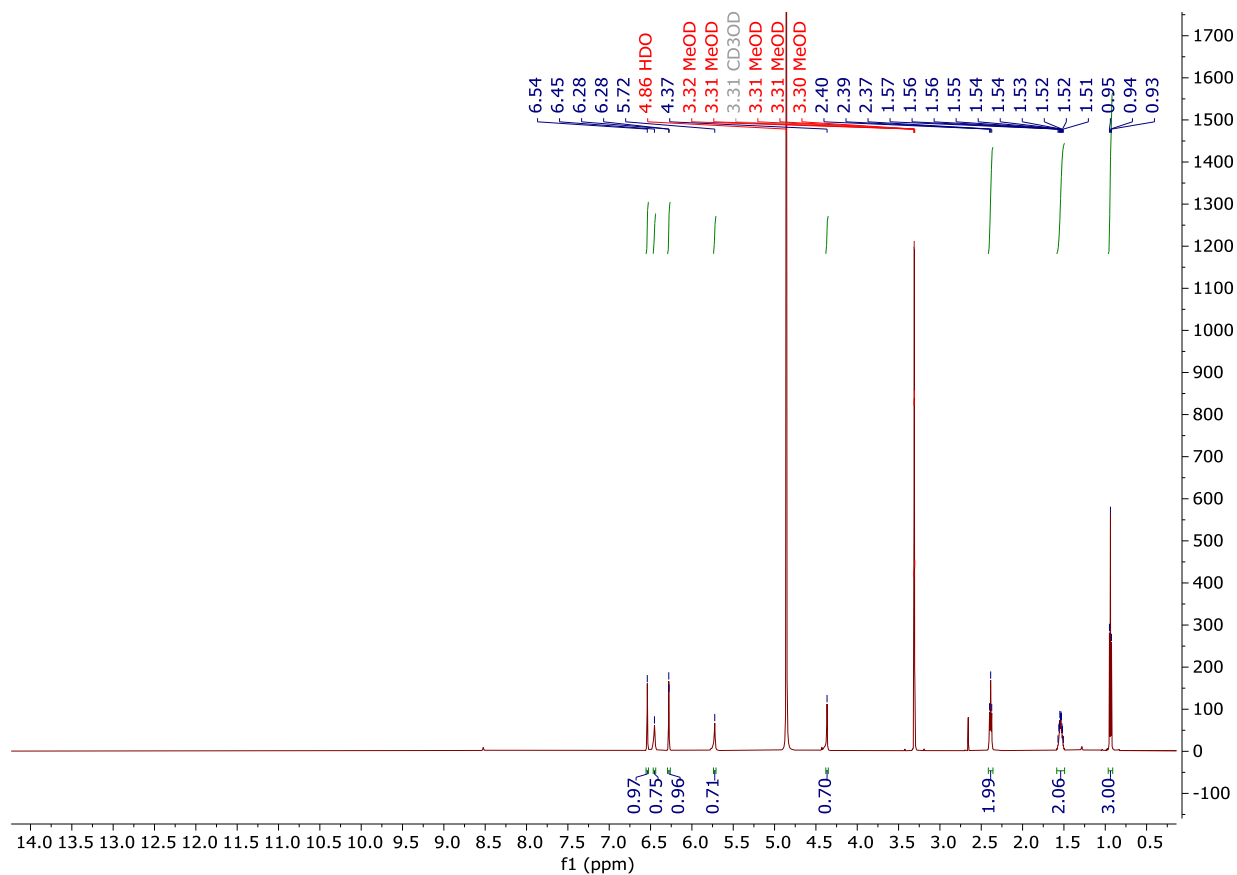

**Figure S4.** 600 MHz <sup>1</sup>H NMR spectrum of crinemodin bianthrone (**1**) in MeOH-d<sub>4</sub>. The spectrum was acquired over 4 scans using the standard zg30 Bruker pulse sequence.

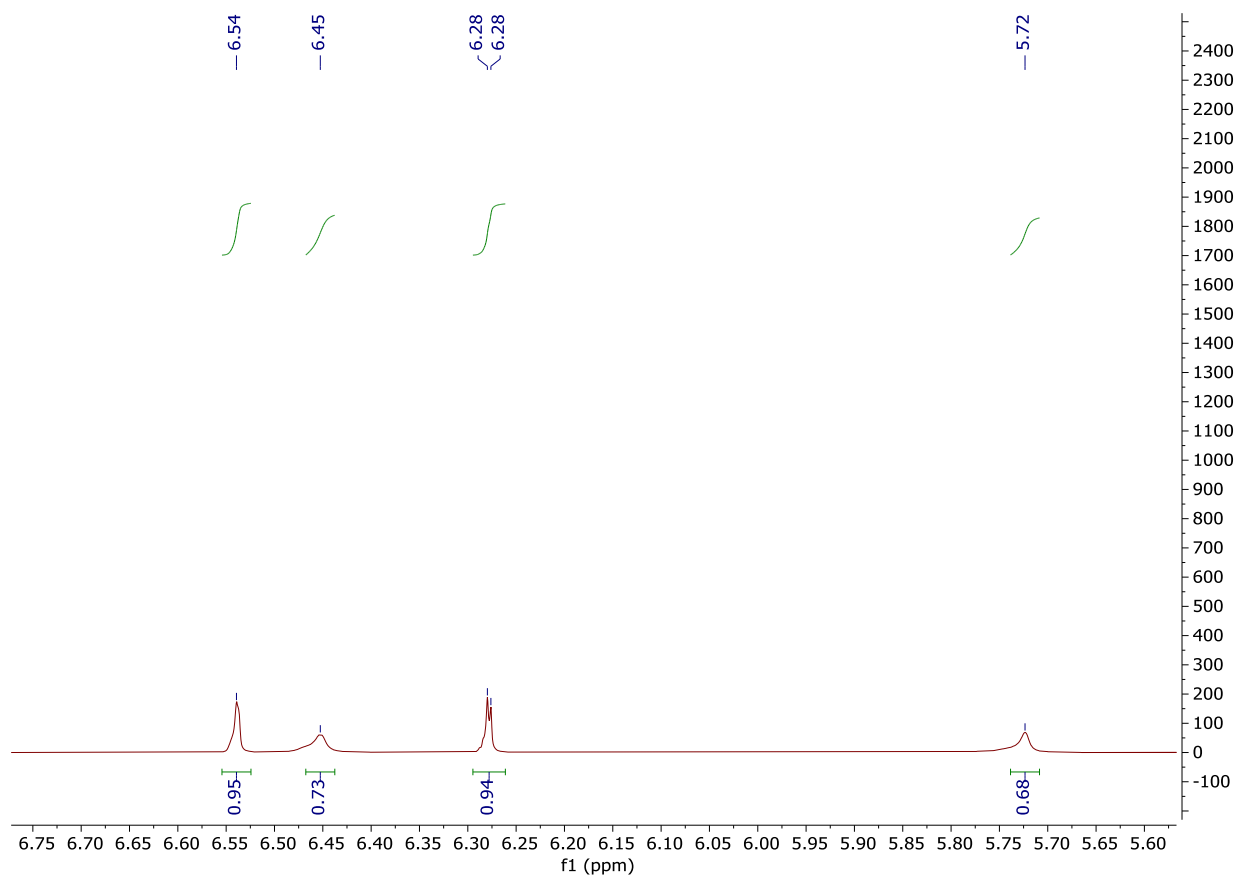

**Figure S5.** Expansion of 600 MHz  $^1\text{H}$  NMR spectrum of crinemodin bianthrone (**1**) in  $\text{MeOH-}d_4$ . The spectrum was acquired over 4 scans using the standard zg30 Bruker pulse sequence.



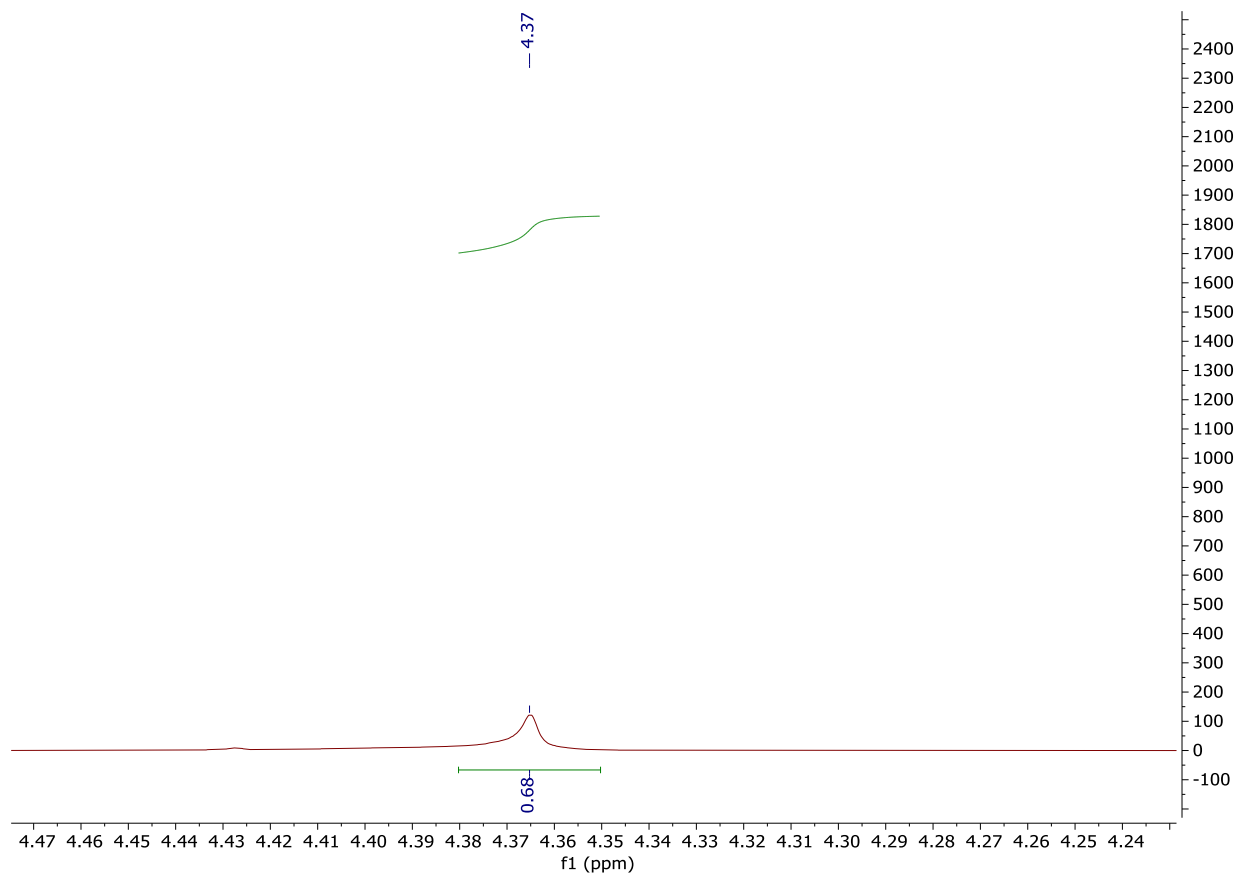

**Figure S6.** Expansion of 600 MHz  $^1\text{H}$  NMR spectrum of crinemodin bianthrone (**1**) in  $\text{MeOH-}d_4$ . The spectrum was acquired over 4 scans using the standard zg30 Bruker pulse sequence.

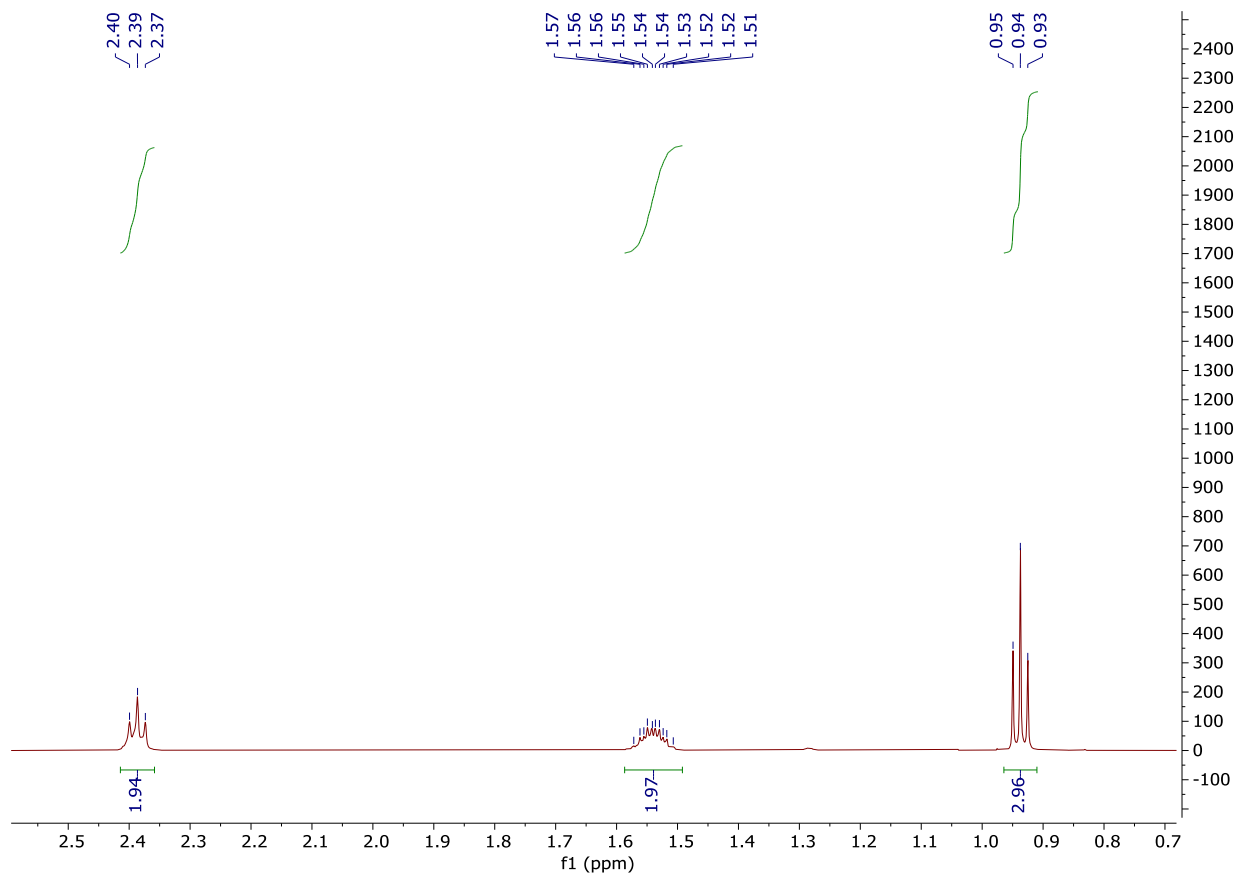

**Figure S7.** Expansion of 600 MHz <sup>1</sup>H NMR spectrum of crinemodin bianthrone (**1**) in MeOH-d<sub>4</sub>. The spectrum was acquired over 4 scans using the standard zg30 Bruker pulse sequence.

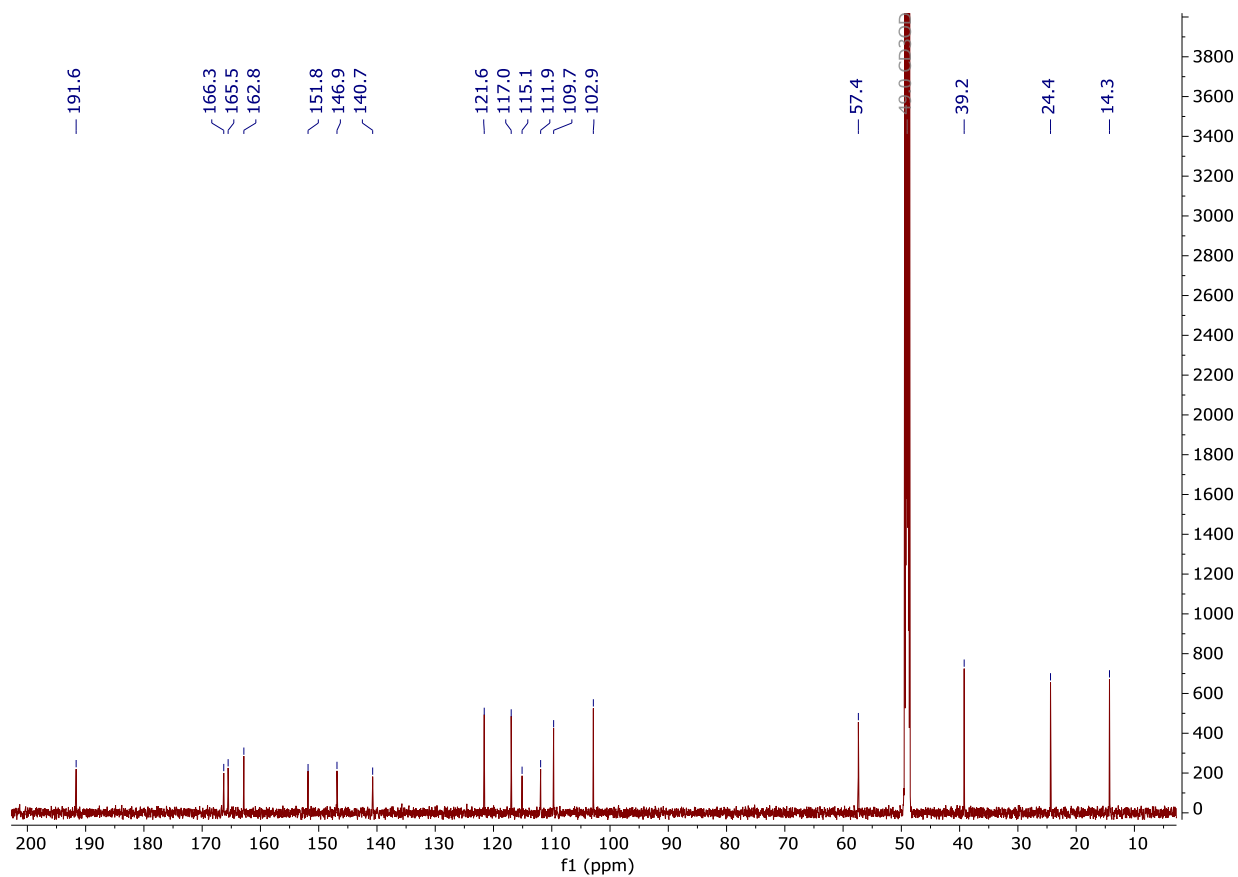

**Figure S8.** 151 MHz  $^{13}\text{C}$  NMR spectrum of crinemodin bianthrone (**1**) in  $\text{MeOH-}d_4$ . The spectrum was acquired over 10000 scans using the standard zgpg30 Bruker pulse sequence.

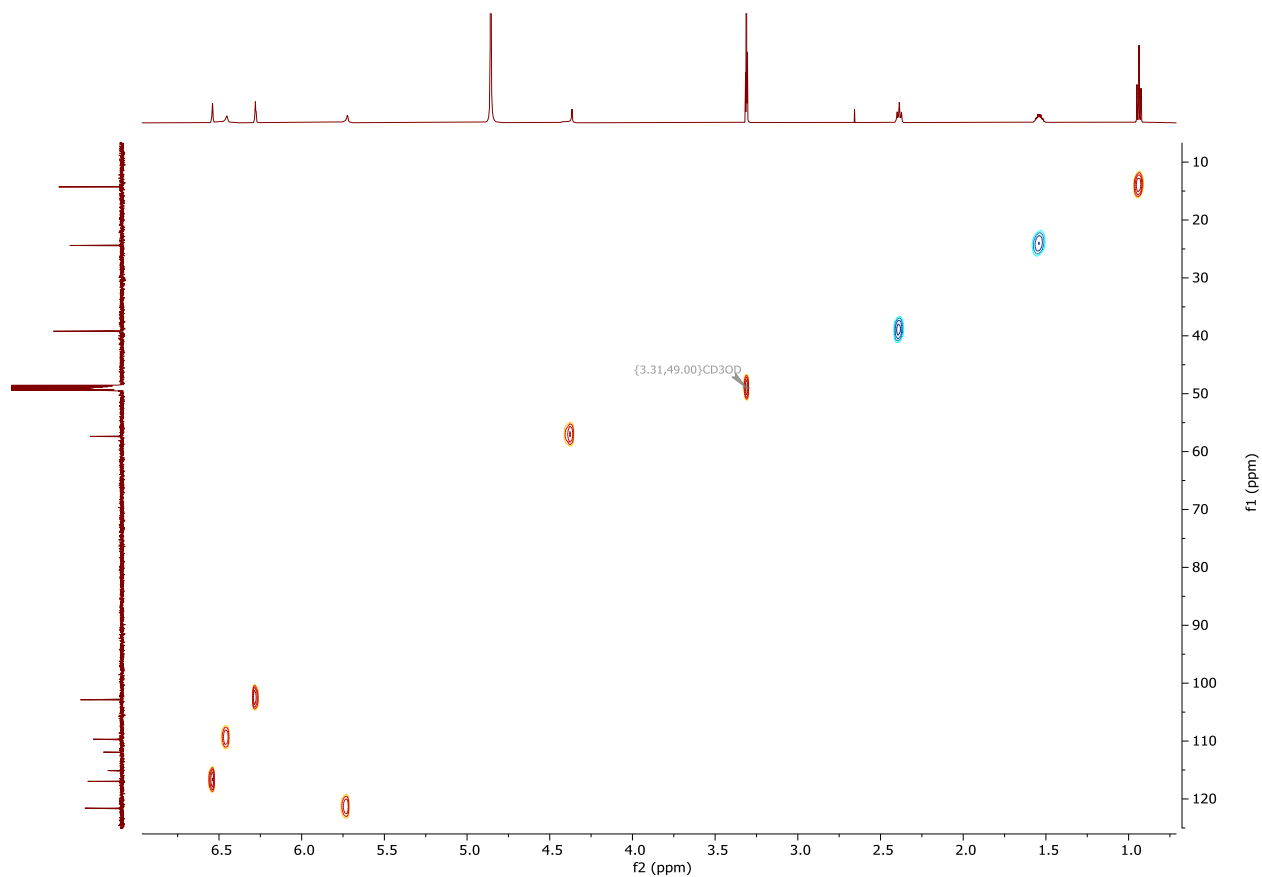

**Figure S9.**  $^1\text{H}$ - $^{13}\text{C}$  HSQC NMR spectrum of crinemodin bianthrone (**1**) in  $\text{MeOH-}d_4$ . The spectrum was acquired over 80 scans at 1024 t1 increments using the standard hsqcedetgpsi2.3 Bruker pulse sequence.

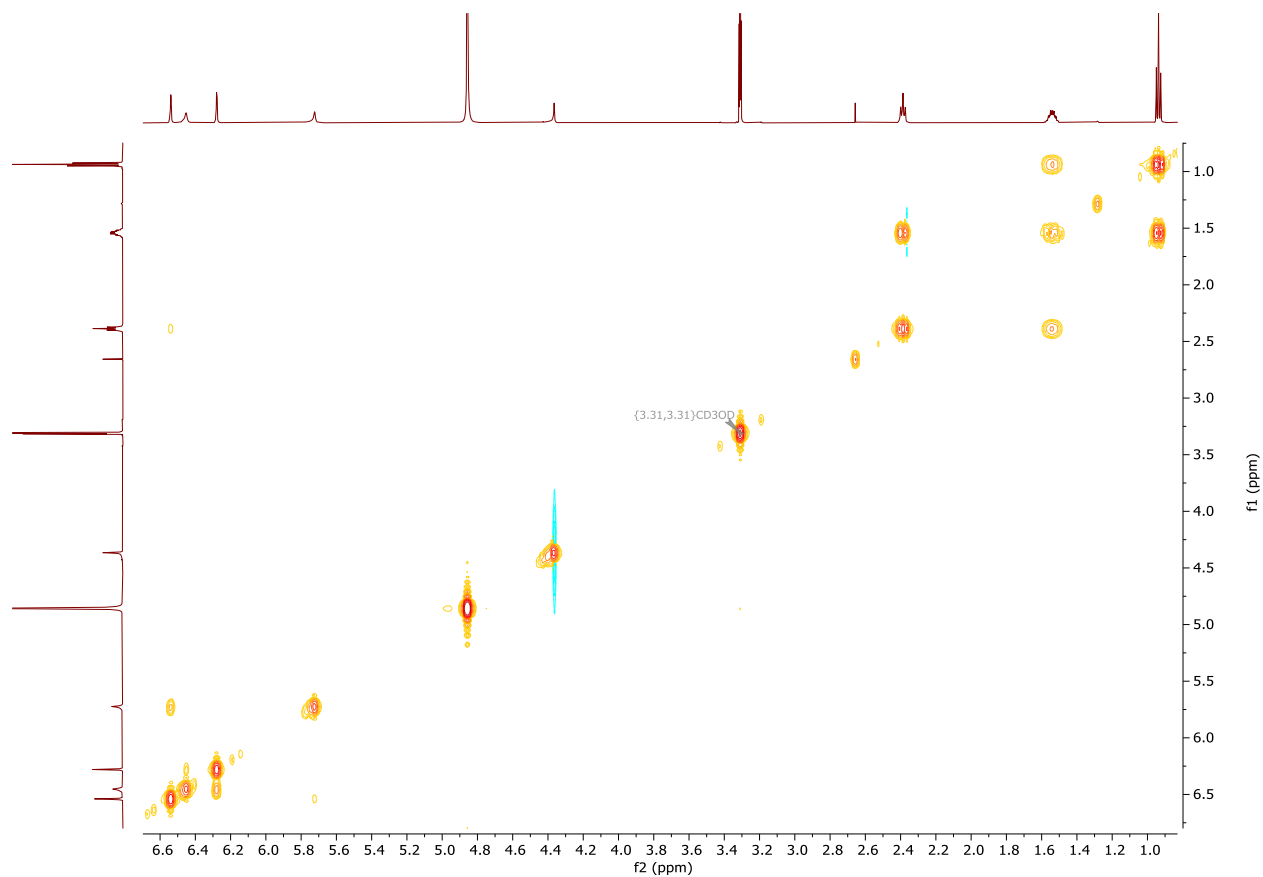

**Figure S10.**  $^1\text{H}$ - $^1\text{H}$  COSY NMR spectrum of crinemodin bianthrone (**1**) in  $\text{MeOH-}d_4$ . The spectrum was acquired over 8 scans at 1024  $t_1$  increments using the standard cosypppqf Bruker pulse sequence.

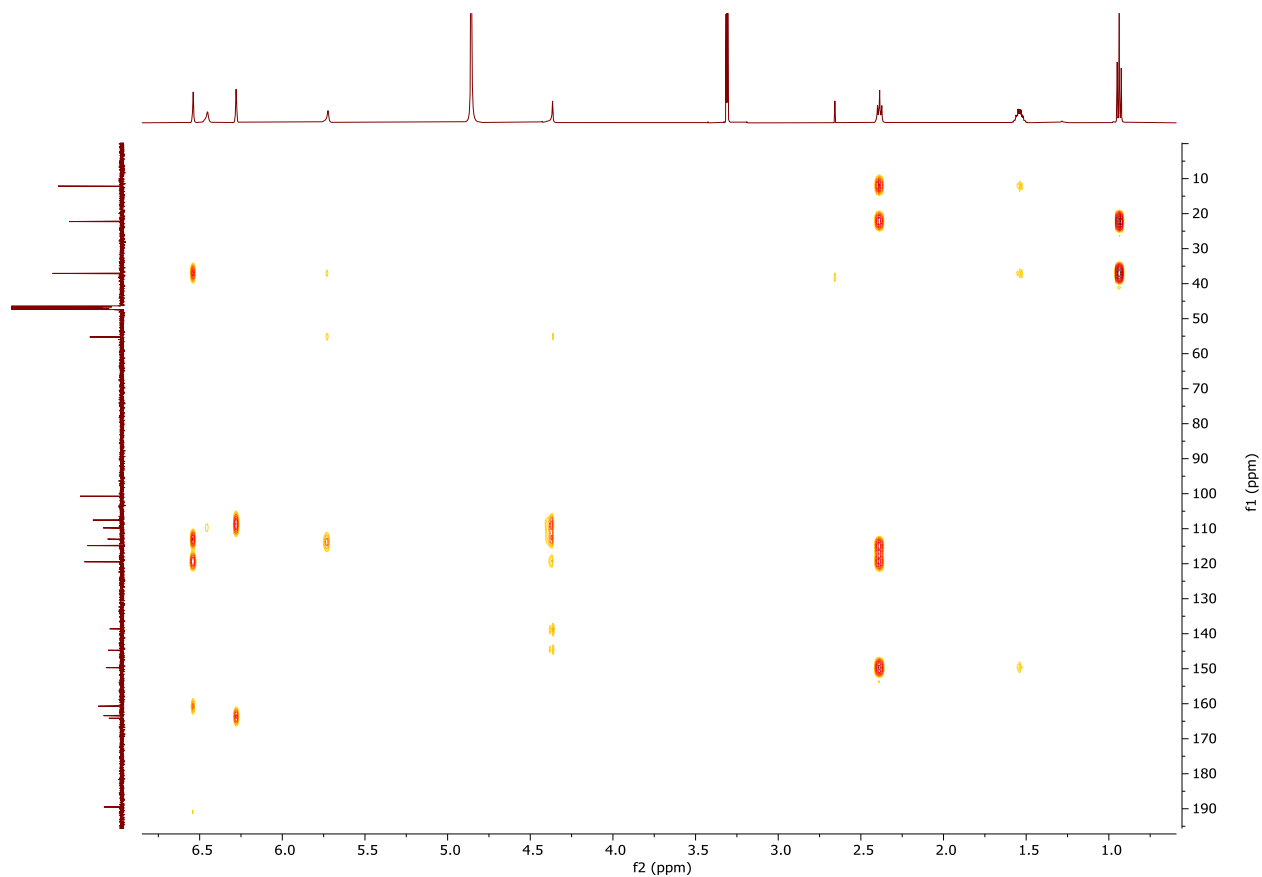

**Figure S11.**  $^1\text{H}$ - $^{13}\text{C}$  HMBC NMR spectrum of crinemodin bianthrone (**1**) in  $\text{MeOH-}d_4$ . The spectrum was acquired over 296 scans at 2048 t1 increments using the standard hmbcetgpl3nd Bruker pulse sequence.

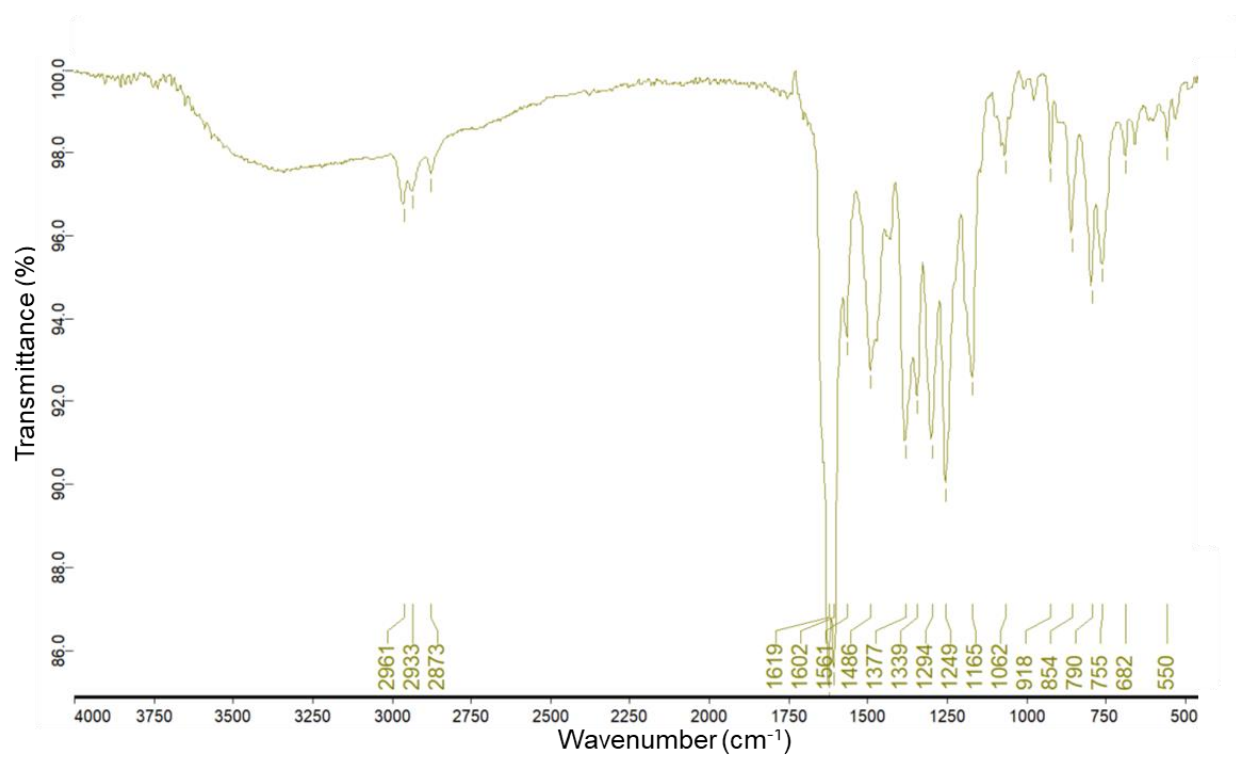

**Figure S12.** FTIR spectrum of crinemodin bianthrone (**1**).

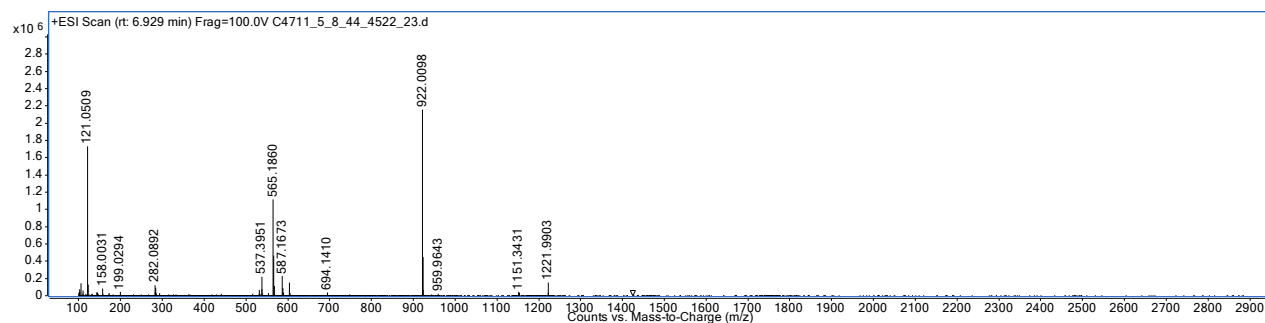

**Figure S13.** HRESIMS spectrum of 1''-dehydrocrinemodin bianthrone (**2**).

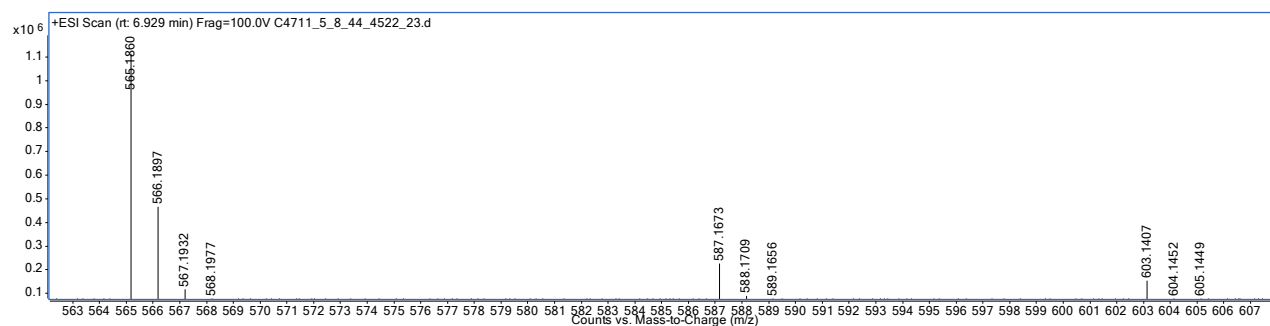

**Figure S14.** Expansion of HRESIMS spectrum of 1''-dehydrocrinemodin bianthrone (**2**).

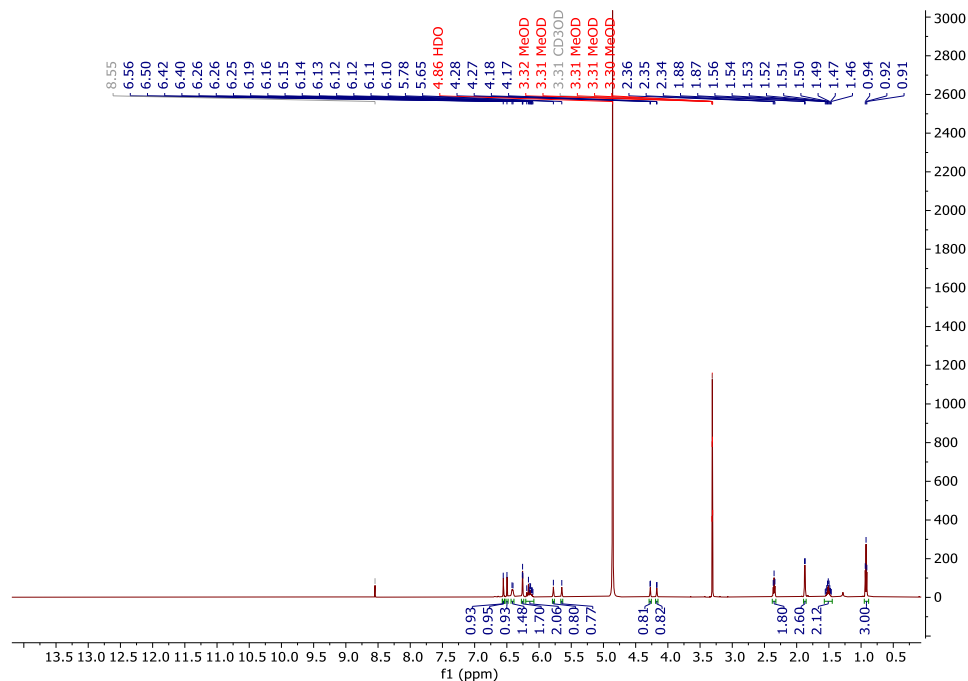

**Figure S15.** 600 MHz <sup>1</sup>H NMR spectrum of 1''-dehydrocrinemodin bianthrone (**2**) in MeOH-*d*<sub>4</sub>. The spectrum was acquired over 4 scans using the standard zg30 Bruker pulse sequence.



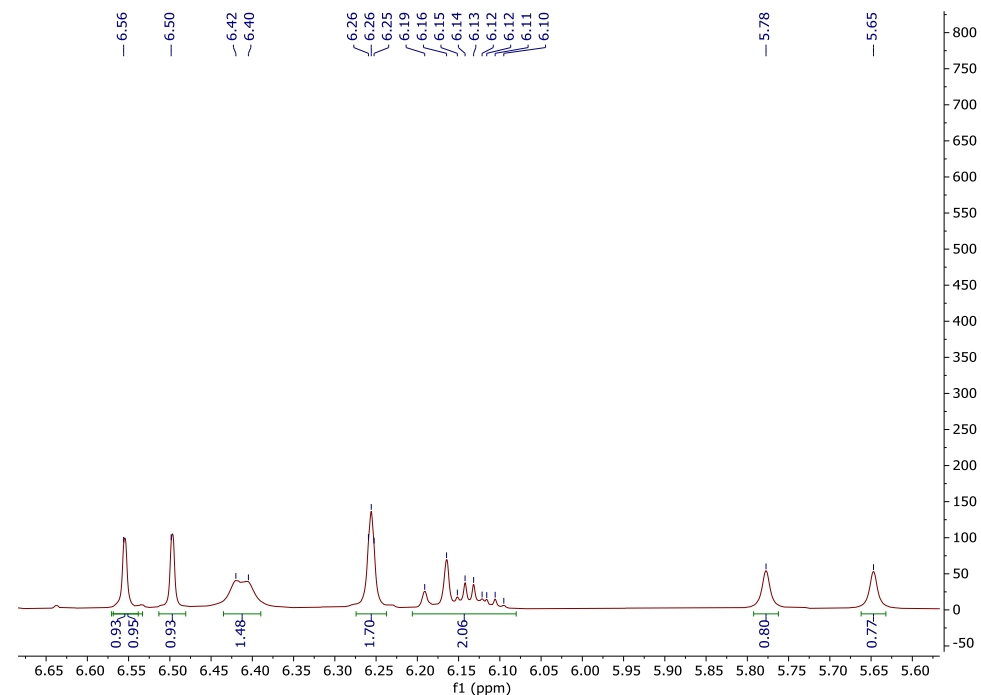

**Figure S16.** Expansion of 600 MHz  $^1\text{H}$  NMR spectrum of 1''-dehydrocrinemodin bianthrone (2) in  $\text{MeOH-}d_4$ . The spectrum was acquired over 4 scans using the standard zg30 Bruker pulse sequence.

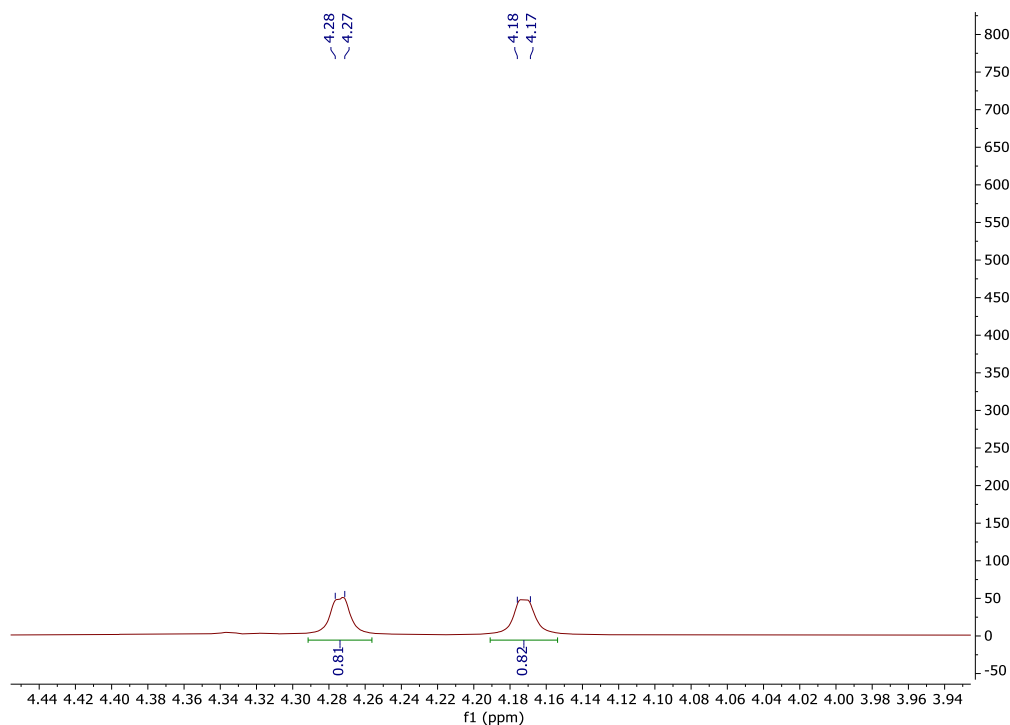

**Figure S17.** Expansion of 600 MHz  $^1\text{H}$  NMR spectrum of 1''-dehydrocrinemodin bianthrone (2) in  $\text{MeOH-}d_4$ . The spectrum was acquired over 4 scans using the standard zg30 Bruker pulse sequence.

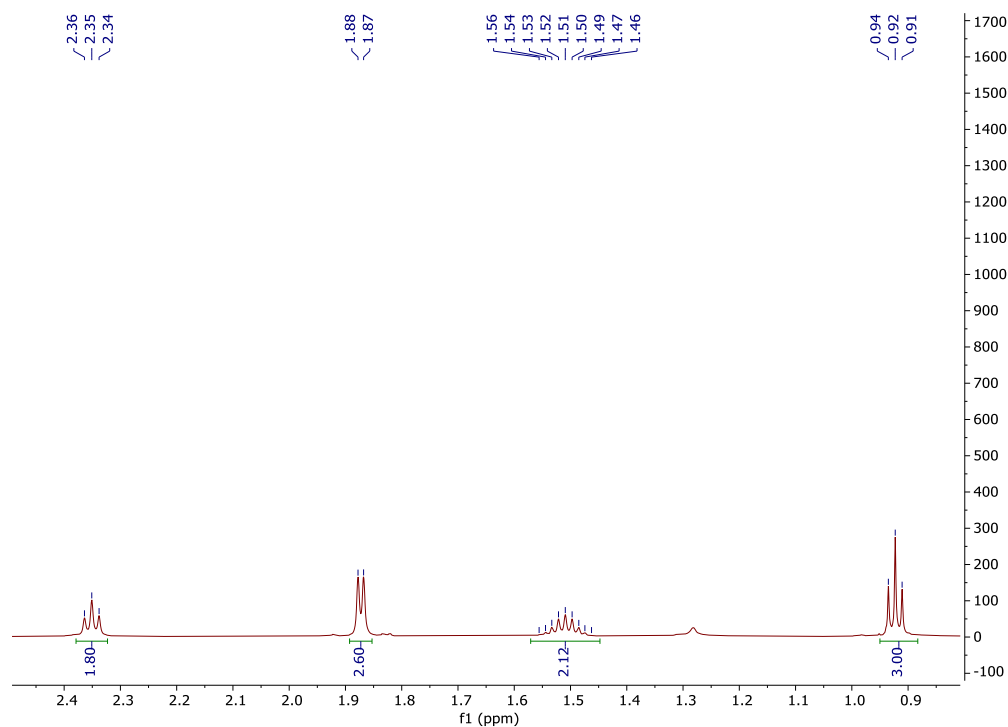

**Figure S18.** Expansion of 600 MHz  $^1\text{H}$  NMR spectrum of 1''-dehydrocrinemodin bianthrone (**2**) in  $\text{MeOH-}d_4$ . The spectrum was acquired over 4 scans using the standard zg30 Bruker pulse sequence.

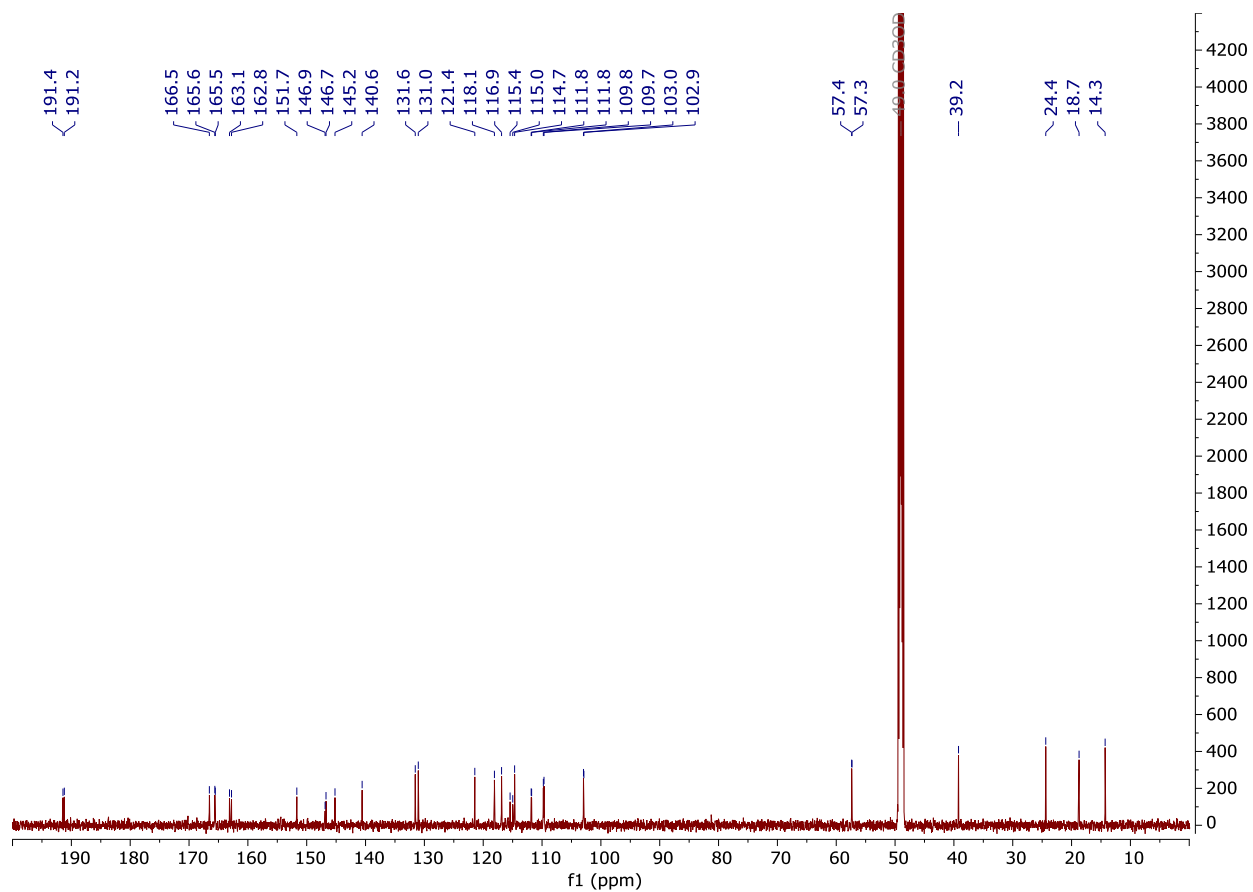

**Figure S19.** 151 MHz  $^{13}\text{C}$  NMR spectrum of 1''-dehydrocrinemodin bianthrone (**2**) in  $\text{MeOH-}d_4$ . The spectrum was acquired over 10000 scans using the standard zgpg30 Bruker pulse sequence.

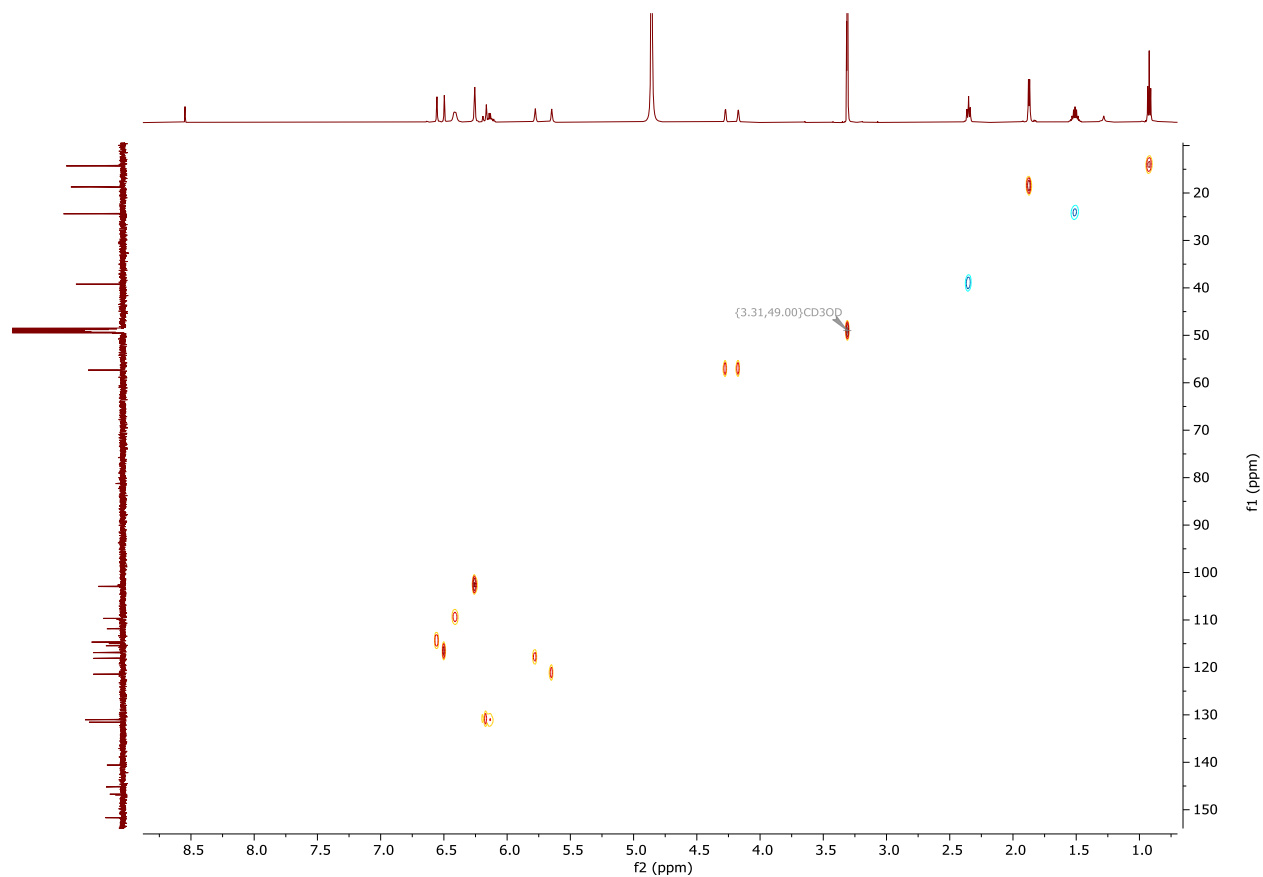

**Figure S20.**  $^1\text{H}$ - $^{13}\text{C}$  HSQC NMR spectrum of 1''-dehydrocrinemodin bianthrone (**2**) in  $\text{MeOH-}d_4$ . The spectrum was acquired over 64 scans at 1024  $t_1$  increments using the standard hsqcedetgpsisp2.3 Bruker pulse sequence.

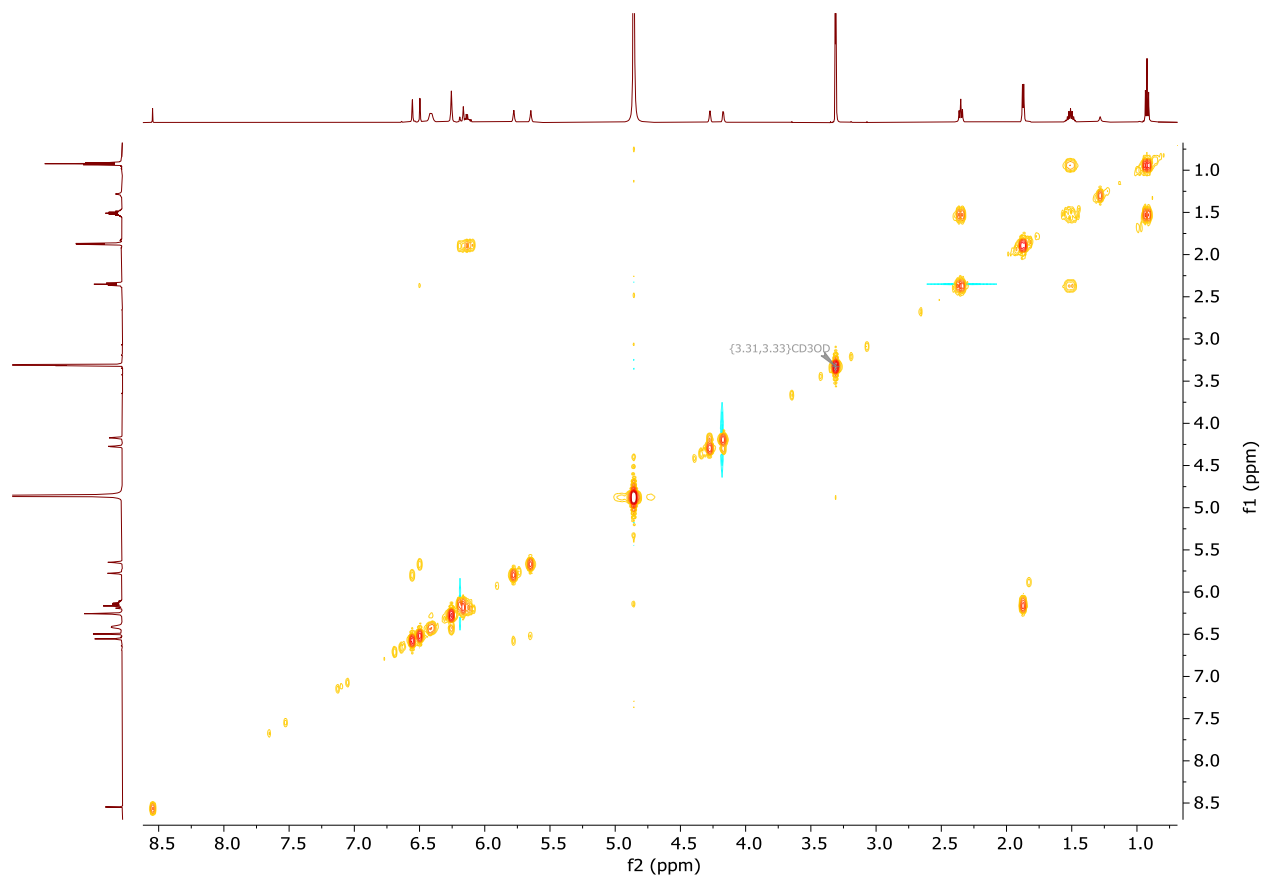

**Figure S21.**  $^1\text{H}$ - $^1\text{H}$  COSY NMR spectrum of 1''-dehydrocrinemodin bianthrone (**2**) in  $\text{MeOH-}d_4$ . The spectrum was acquired over 4 scans at 1024  $t_1$  increments using the standard  $\text{cosygpppqf}$  Bruker pulse sequence.

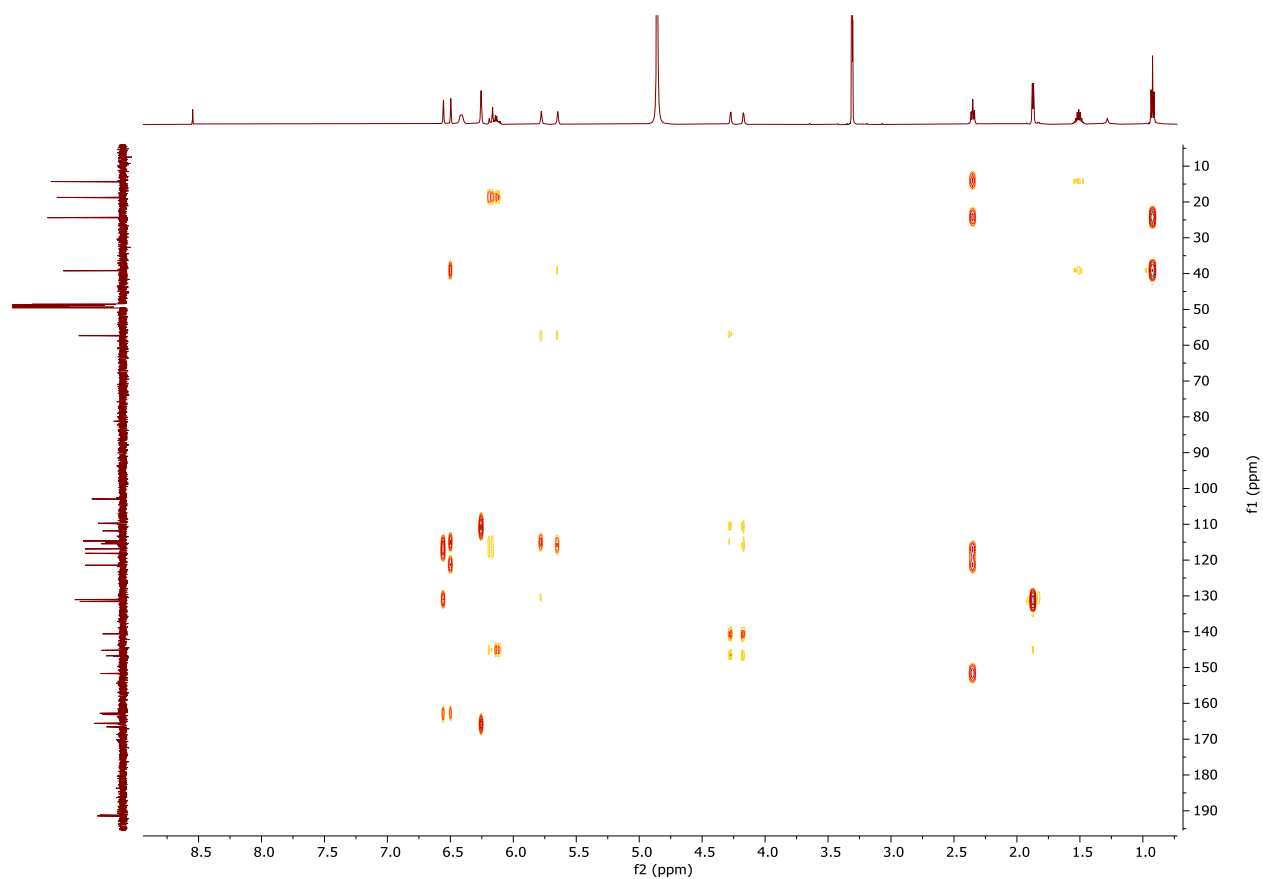

**Figure S22.**  $^1\text{H}$ - $^{13}\text{C}$  HMBC NMR spectrum of 1''-dehydrocrinemodin bianthrone (**2**) in  $\text{MeOH-}d_4$ . The spectrum was acquired over 296 scans at 2048  $t_1$  increments using the standard hmbcetgpl3nd Bruker pulse sequence.

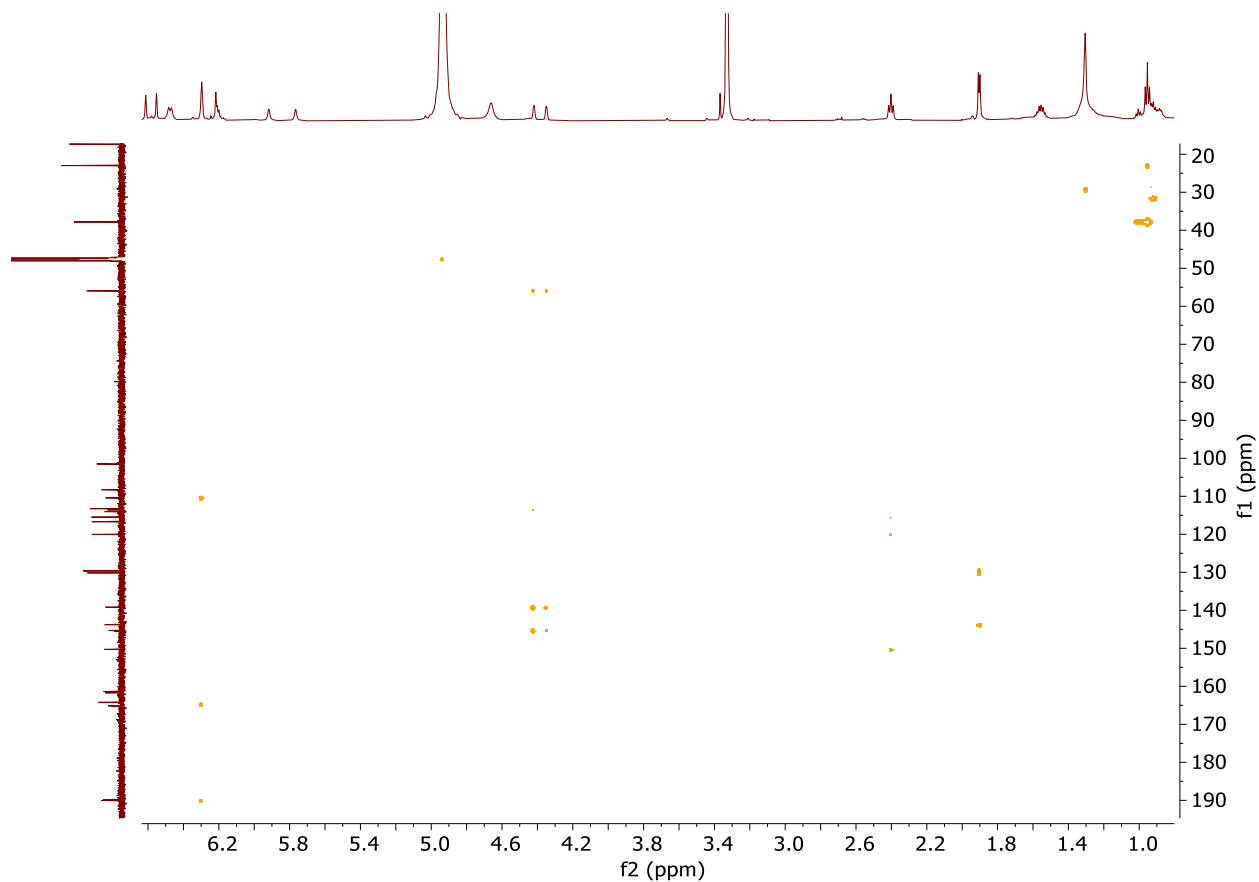

**Figure S23.**  $^1\text{H}$ - $^{13}\text{C}$  LRHSQMBC NMR spectrum of 1''-dehydrocrinmodin bianthrone (**2**) in  $\text{MeOH-}d_4$ . The spectrum was acquired over 300 scans at 2048 t1 increments using the js\_lrhsqmbc\_final pulse sequence.

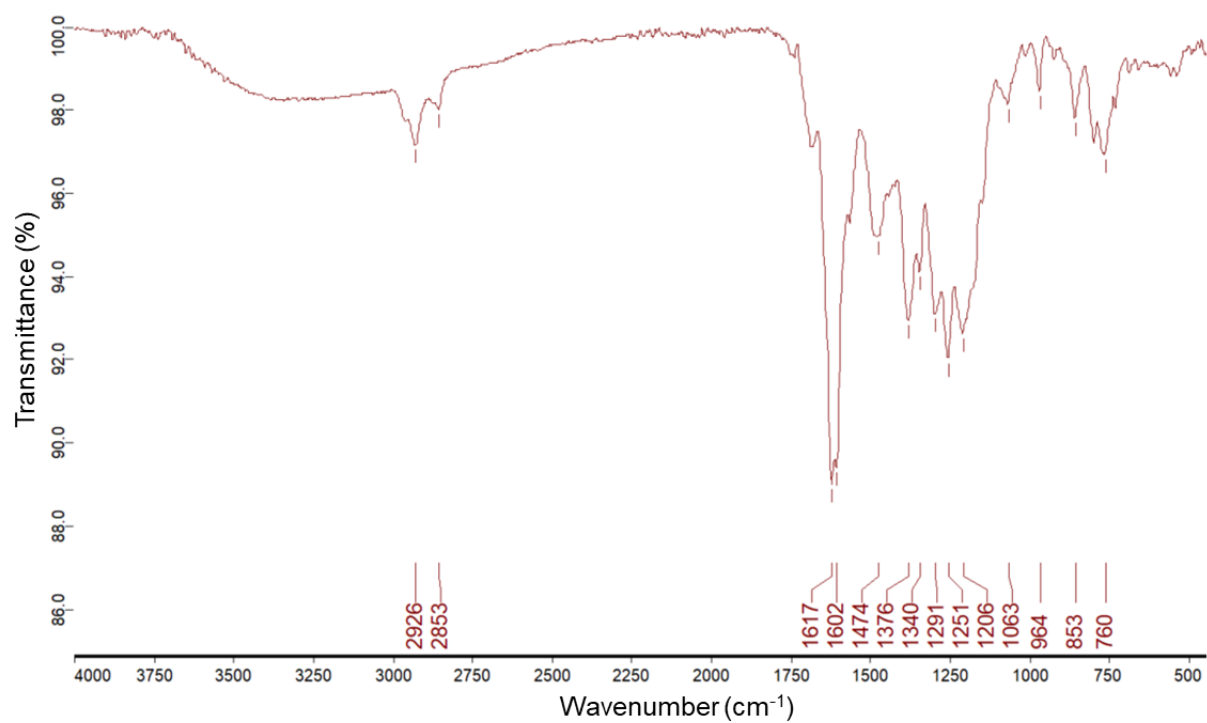

**Figure S24.** FTIR spectrum for 1''-dehydrocrinemodin bianthrone (**2**).



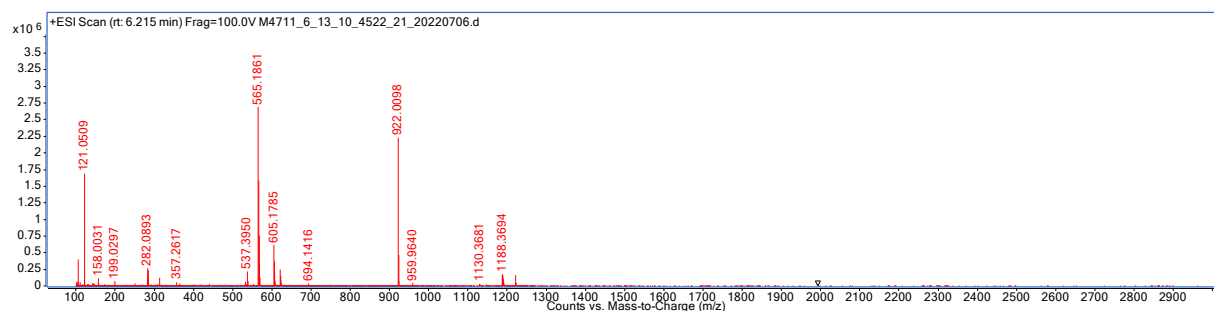

**Figure S25.** HRESIMS spectrum of 1''-hydroxycrinemodin bianthrone (3).

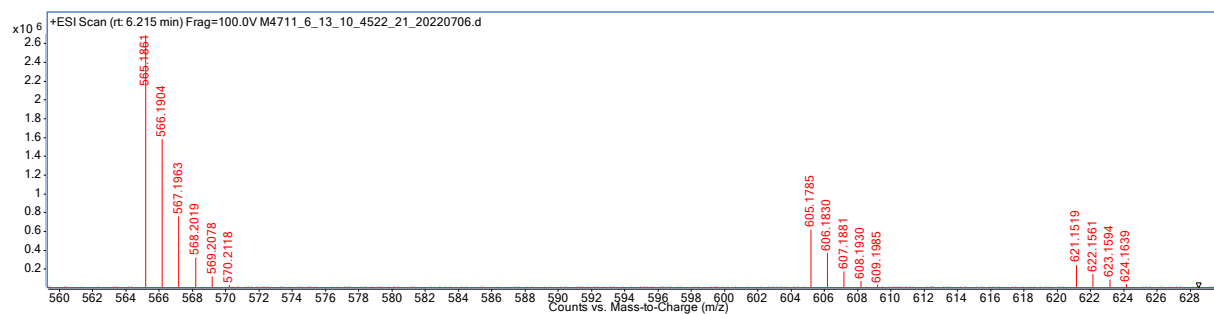

**Figure S26.** Expansion of HRESIMS spectrum of 1''-hydroxycrinemodin bianthrone (3).

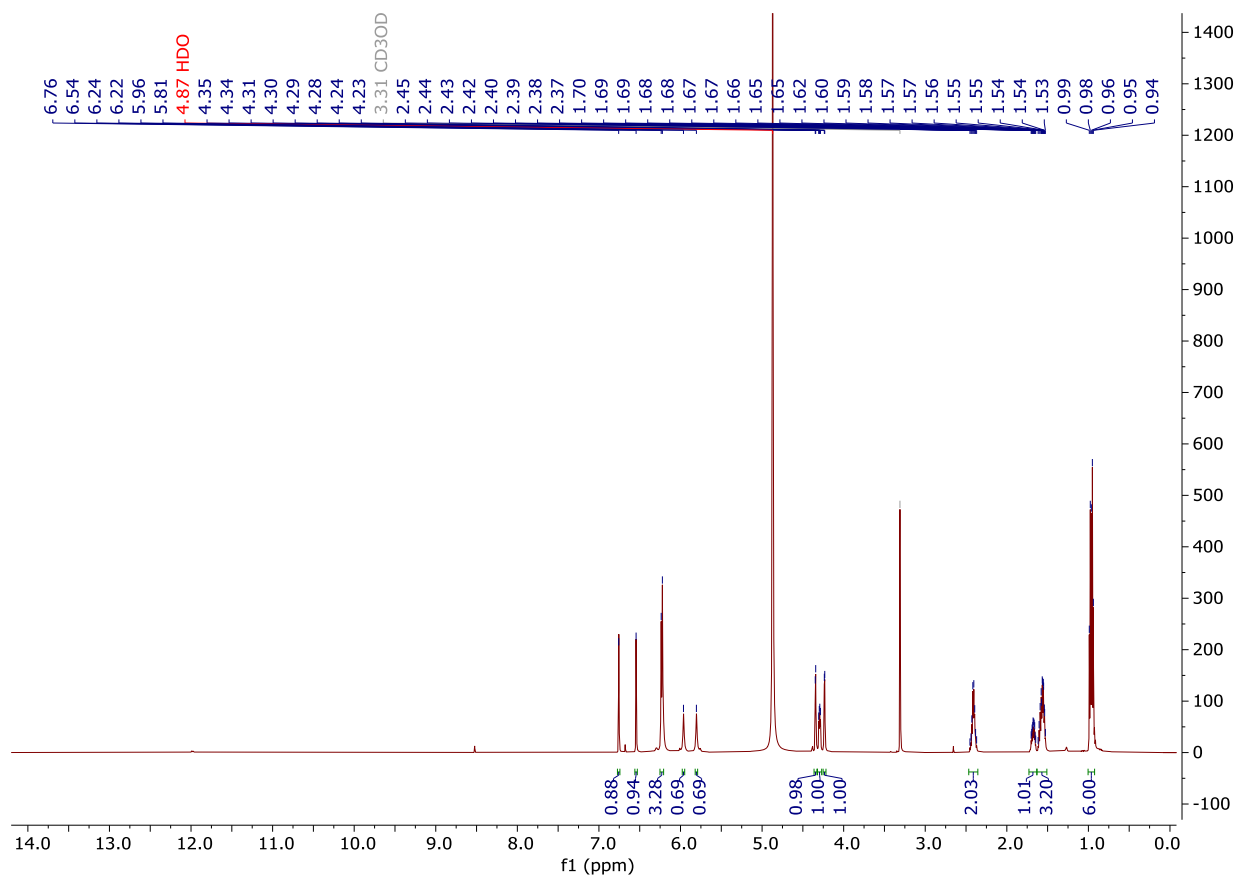

**Figure S27.** 600 MHz <sup>1</sup>H NMR spectrum of 1''-hydroxycrinemodin bianthrone (**3**) in MeOH-*d*<sub>4</sub>. The spectrum was acquired over 4 scans using the standard zg30 Bruker pulse sequence.

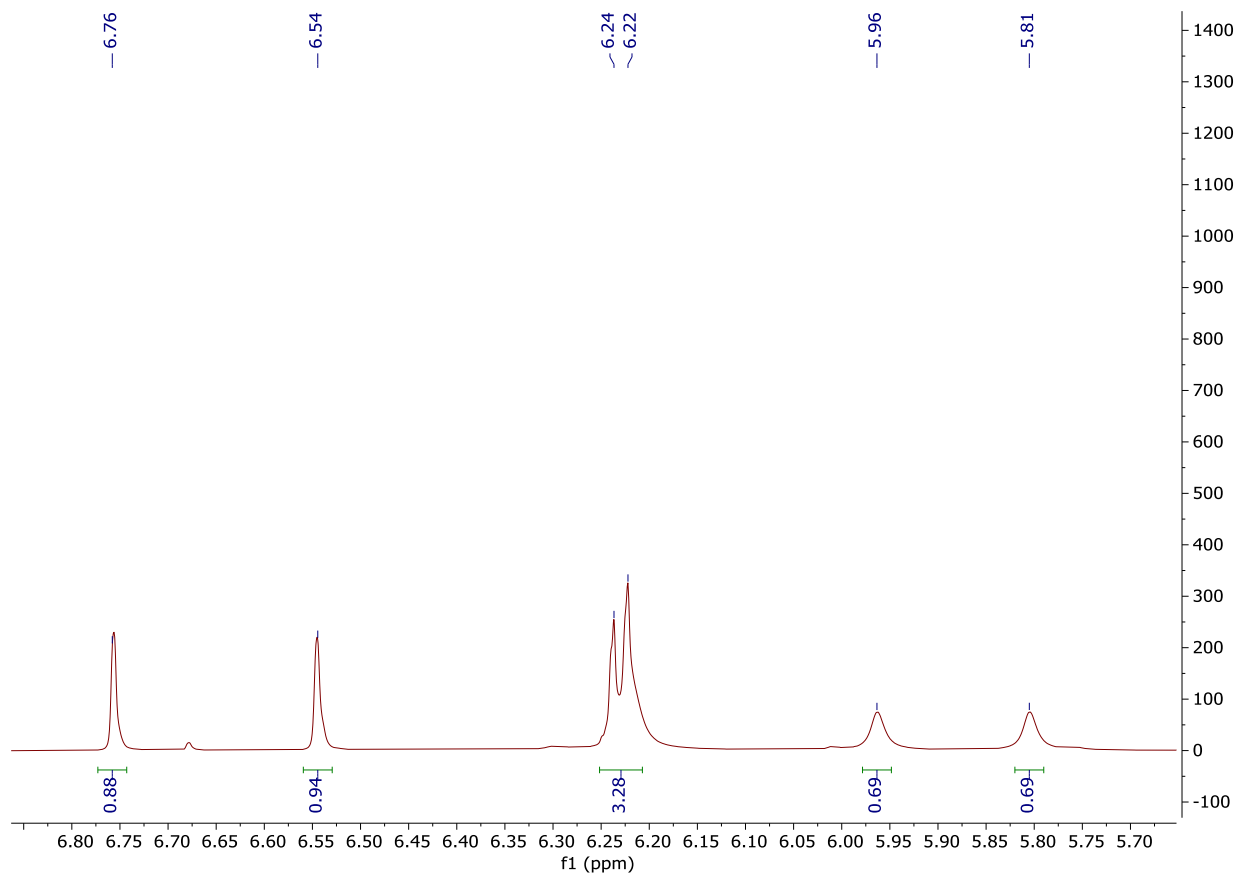

**Figure S28.** Expansion of 600 MHz  $^1\text{H}$  NMR spectrum of 1''-hydroxycrinemodin bianthrone (**3**) in  $\text{MeOH-}d_4$ . The spectrum was acquired over 4 scans using the standard zg30 Bruker pulse sequence.

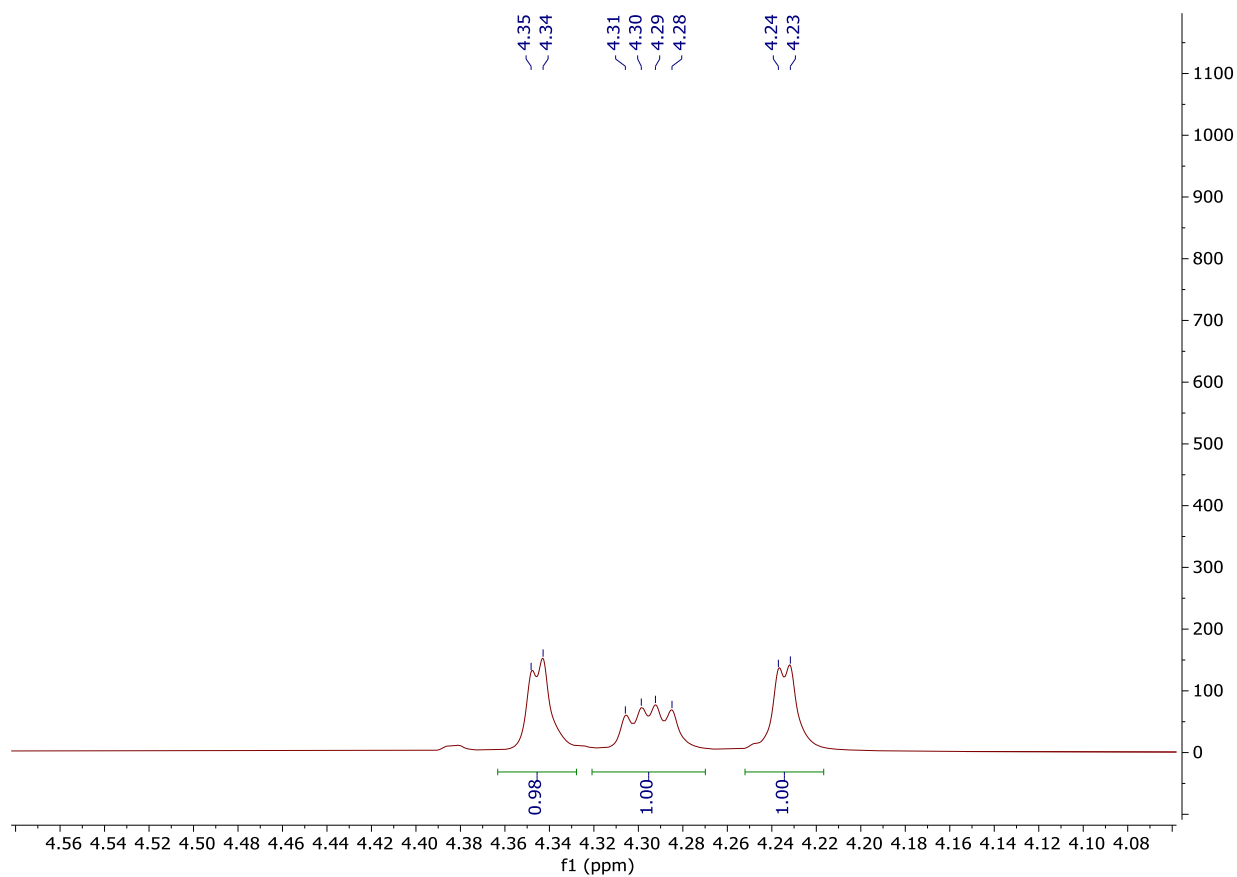

**Figure S29.** Expansion of 600 MHz  $^1\text{H}$  NMR spectrum of 1''-hydroxyocrinemodin bianthrone (**3**) in  $\text{MeOH-}d_4$ . The spectrum was acquired over 4 scans using the standard zg30 Bruker pulse sequence.

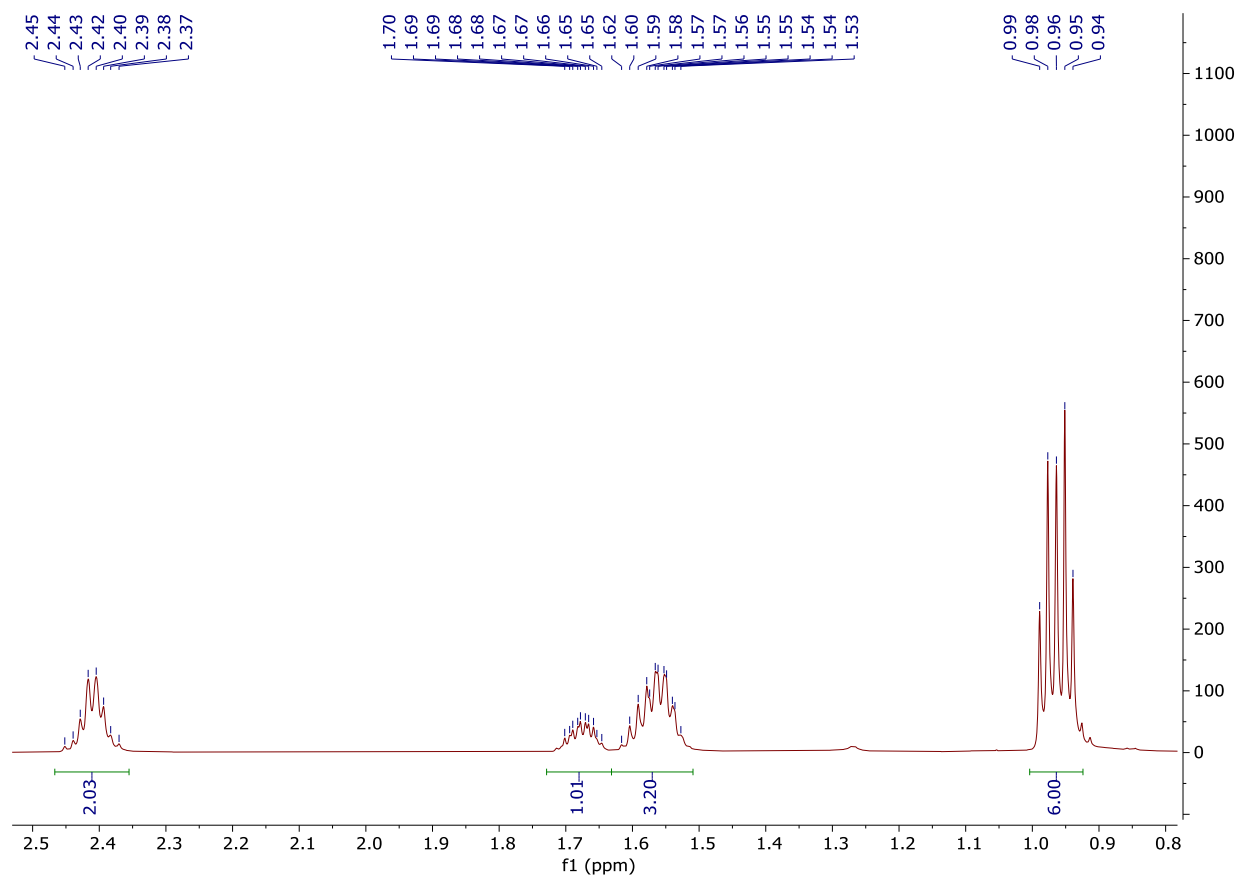

**Figure S30.** Expansion of 600 MHz  $^1\text{H}$  NMR spectrum of 1''-hydroxycrinemodin bianthrone (**3**) in  $\text{MeOH-}d_4$ . The spectrum was acquired over 4 scans using the standard zg30 Bruker pulse sequence.

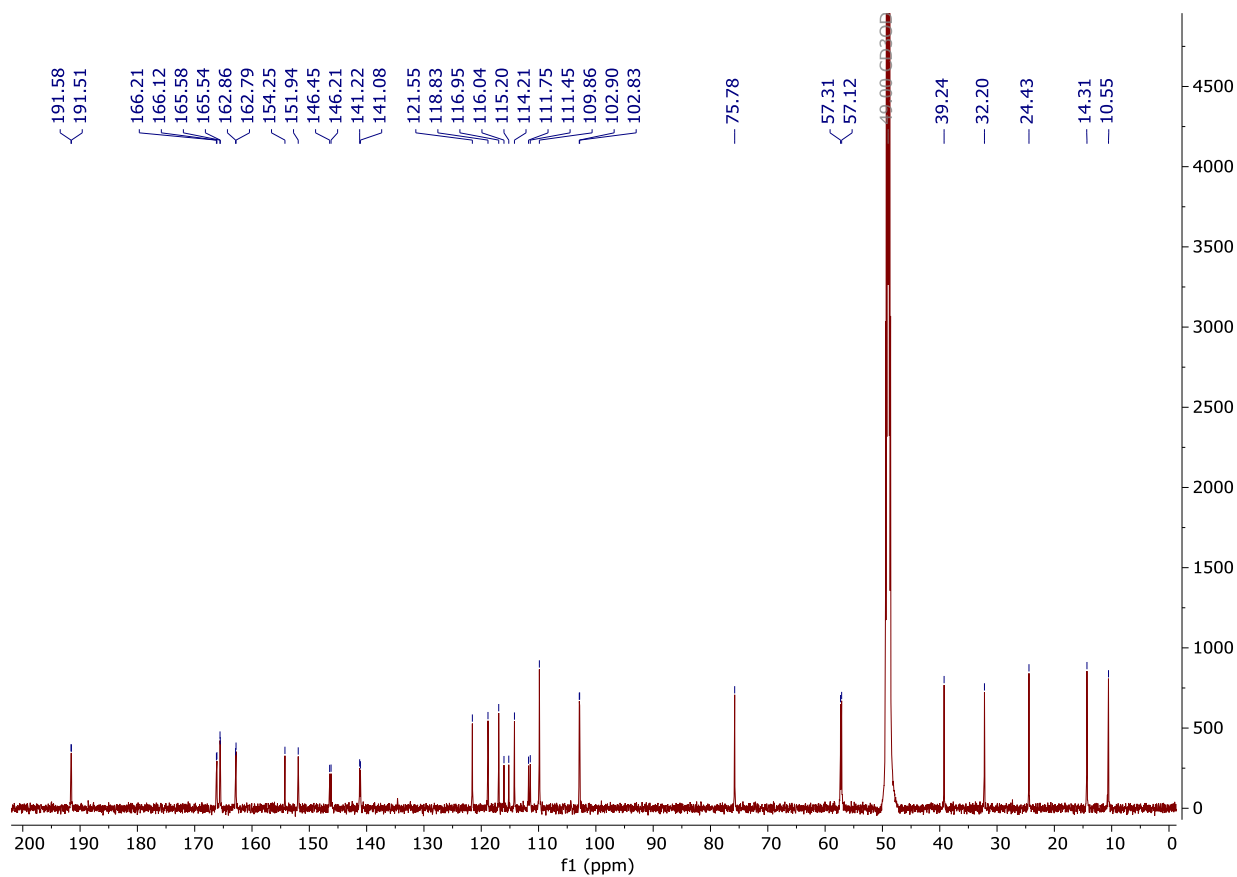

**Figure S31.** 151 MHz  $^{13}\text{C}$  NMR spectrum of 1''-hydroxycrinemodin bianthrone (**3**) in  $\text{MeOH-}d_4$ . The spectrum was acquired over 12000 scans using the standard zgpg30 Bruker pulse sequence.

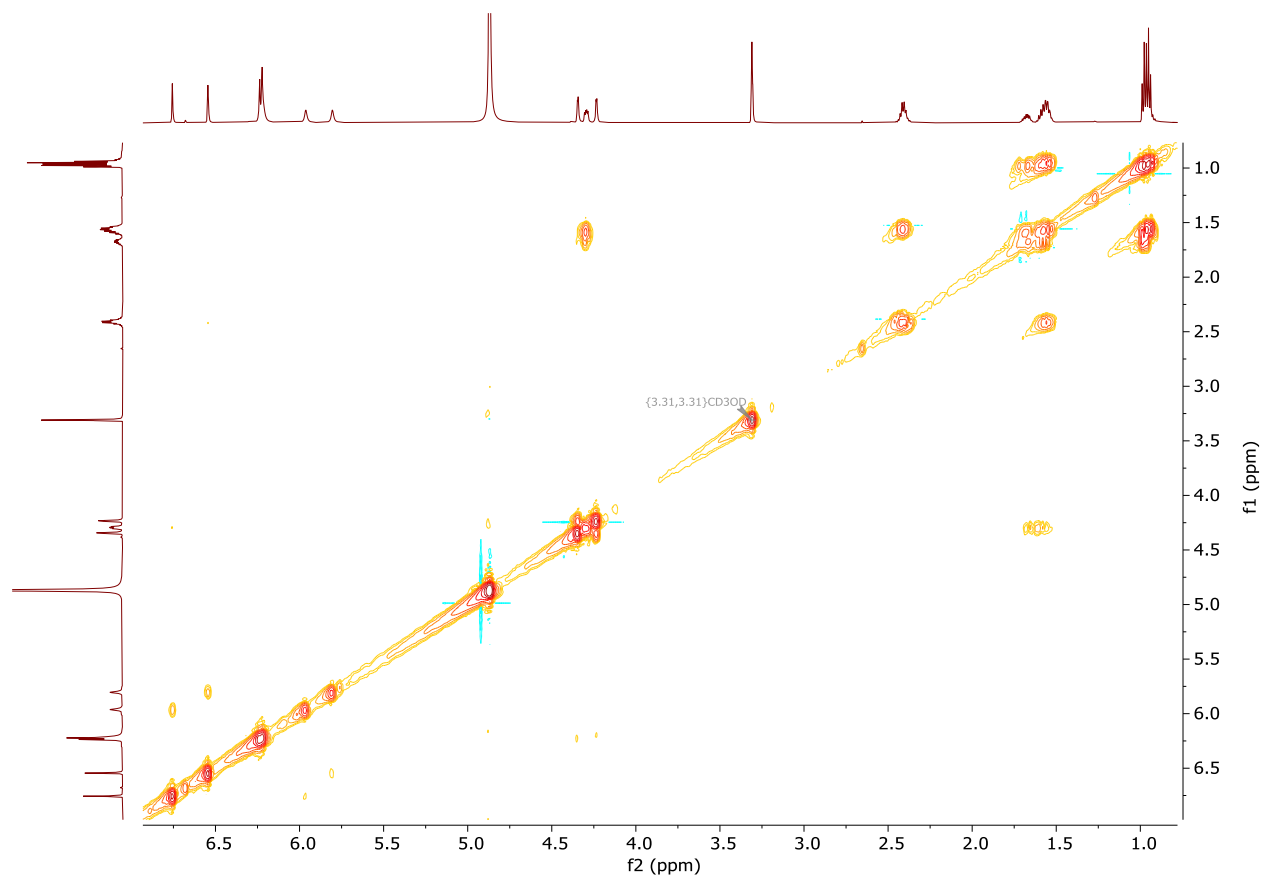

**Figure S32.**  $^1\text{H}$ - $^1\text{H}$  COSY NMR spectrum of 1''-hydroxycinemodin bianthrone (**3**) in  $\text{MeOH-}d_4$ . The spectrum was acquired over 4 scans at 1024  $t_1$  increments using the standard  $\text{cosygpppqf}$  Bruker pulse sequence.

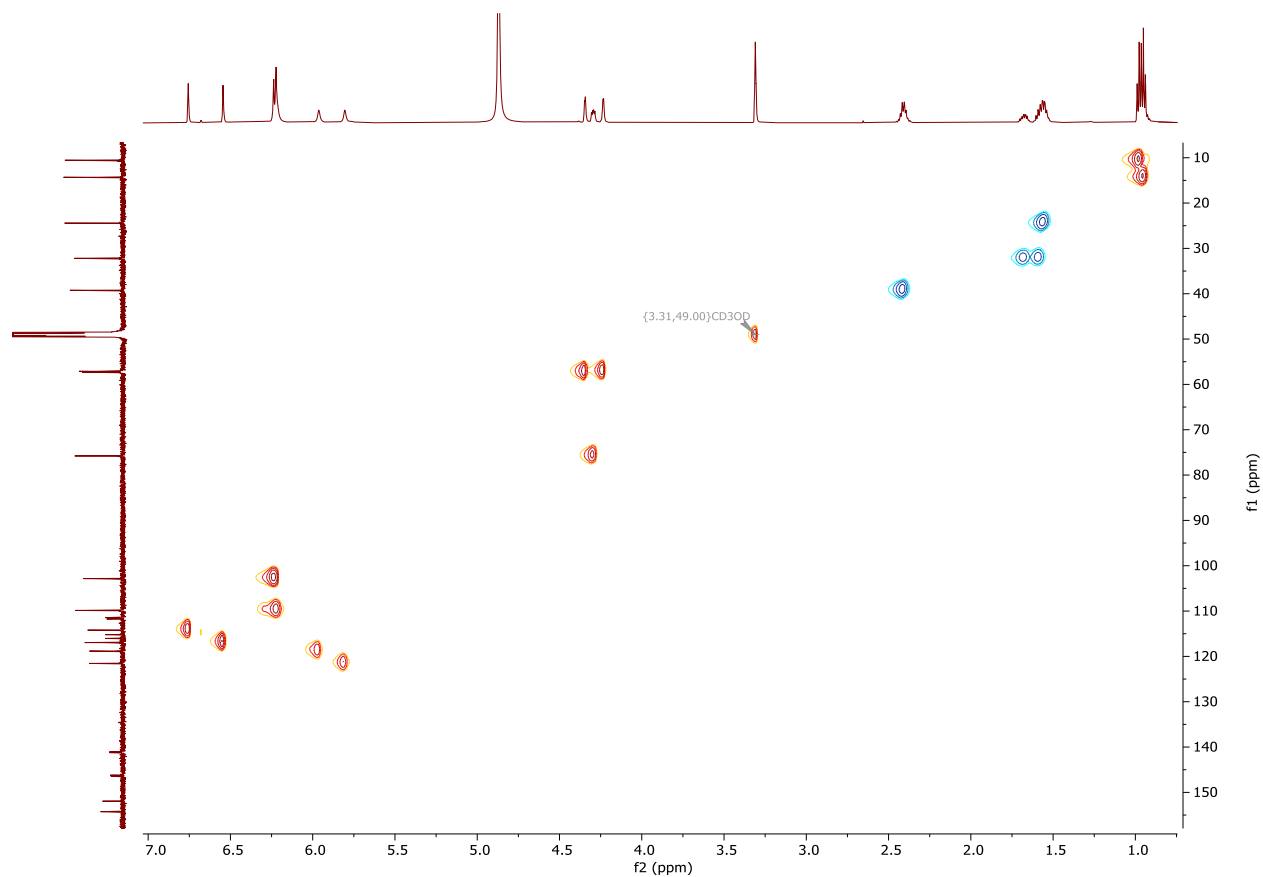

**Figure S33.**  $^1\text{H}$ - $^{13}\text{C}$  HSQC NMR spectrum of 1''-hydroxycrinemodin bianthrone (**3**) in  $\text{MeOH-}d_4$ . The spectrum was acquired over 64 scans at 1024 t1 increments using the standard hsqcedetgpsisp2.3 Bruker pulse sequence.



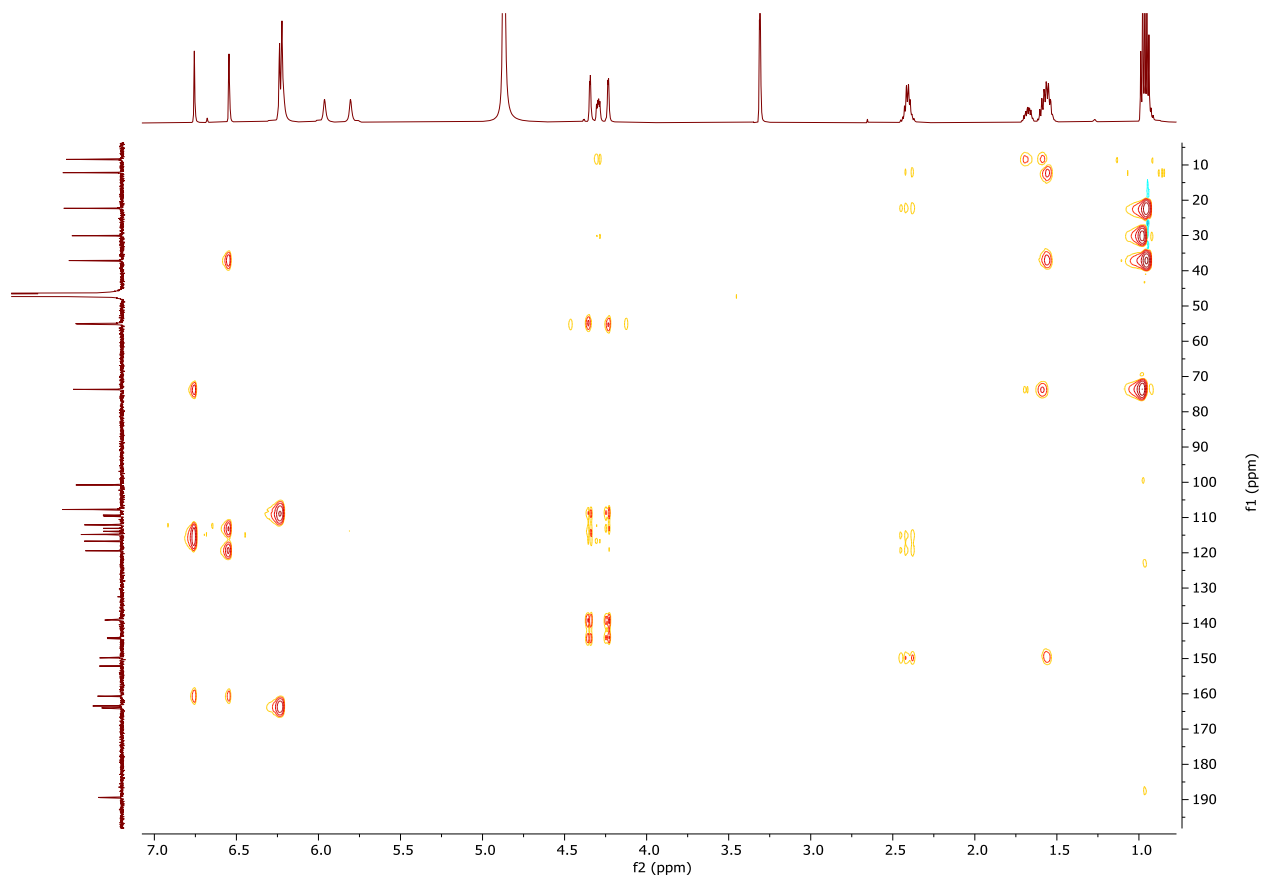

**Figure S34.**  $^1\text{H}$ - $^{13}\text{C}$  HMBC NMR spectrum of 1''-hydroxycrinemodin bianthrone (**3**) in  $\text{MeOH-}d_4$ . The spectrum was acquired over 240 scans at 2048 t1 increments using the standard hmbcetgpl3nd Bruker pulse sequence.

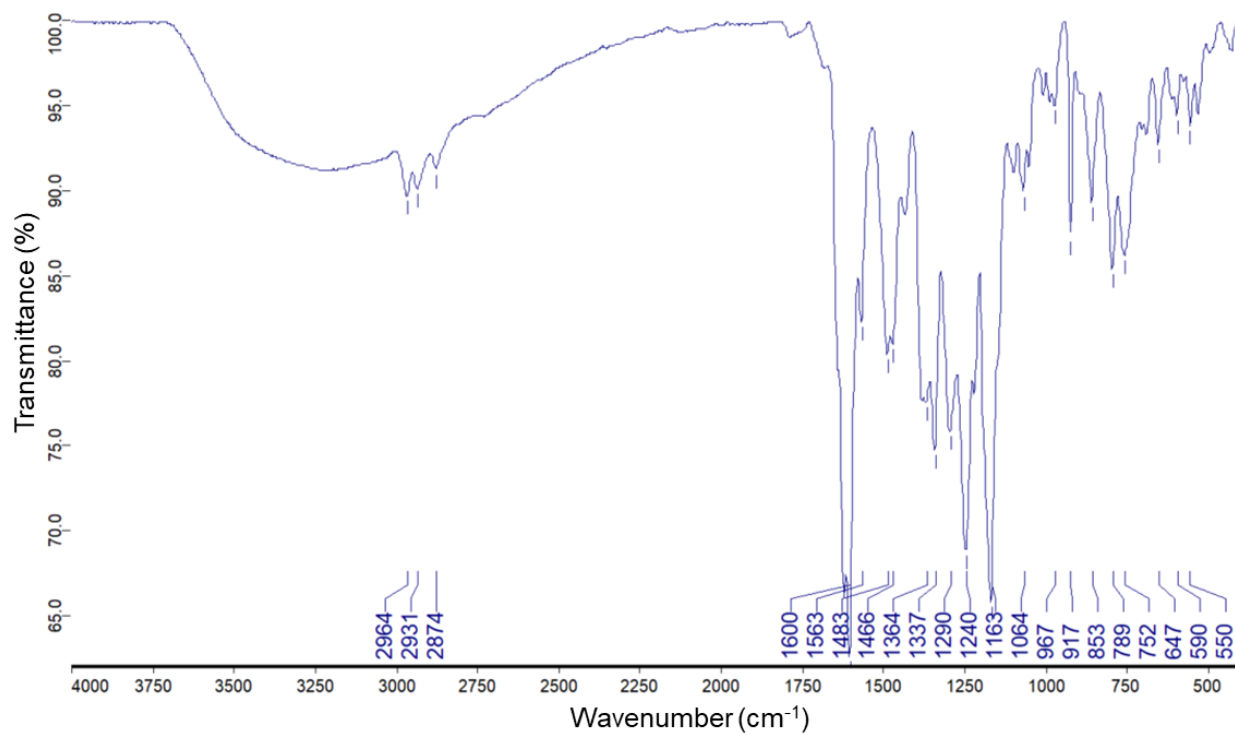

**Figure S35.** FTIR spectrum of 1''-hydroxycrinemodin bianthrone (**3**).

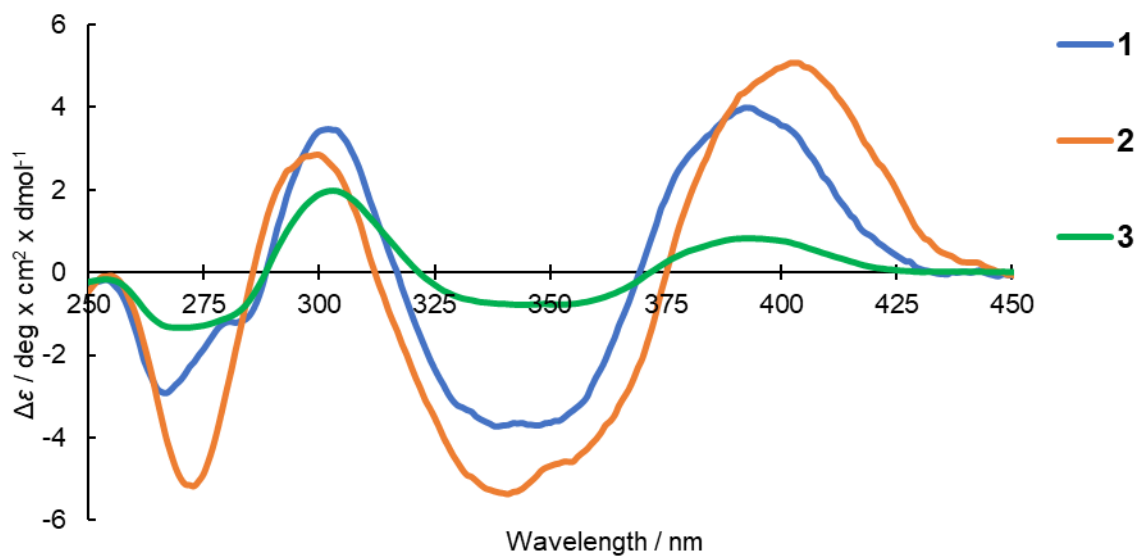

**Figure S36.** ECD spectra overlap of compounds **1**–**3** in acetonitrile.

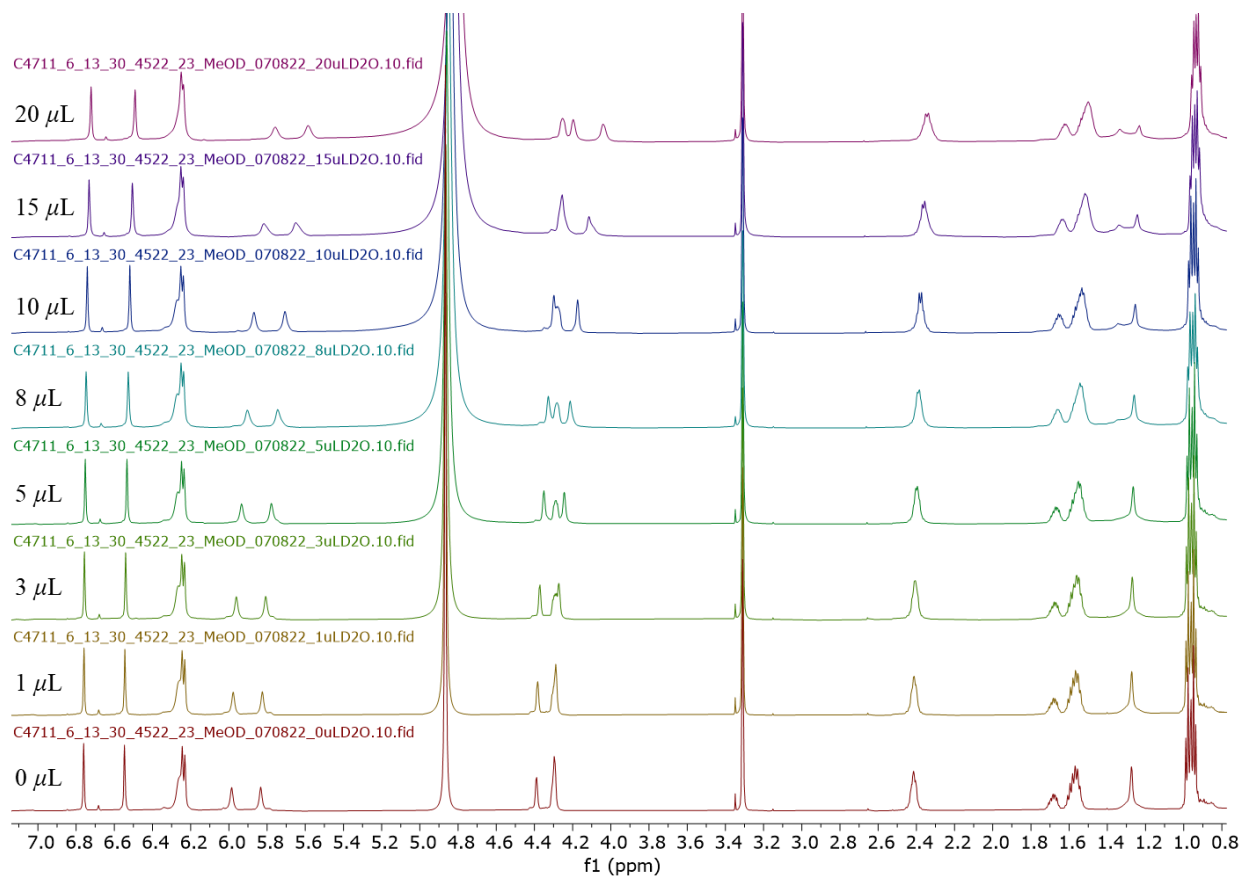

**Figure S37.**  $^1\text{H}$  NMR spectra of **3** (in  $\text{MeOH-}d_4$ ) titration with  $\text{D}_2\text{O}$ , from 0  $\mu\text{L}$  (bottom) to 20  $\mu\text{L}$  (top) of  $\text{D}_2\text{O}$ .

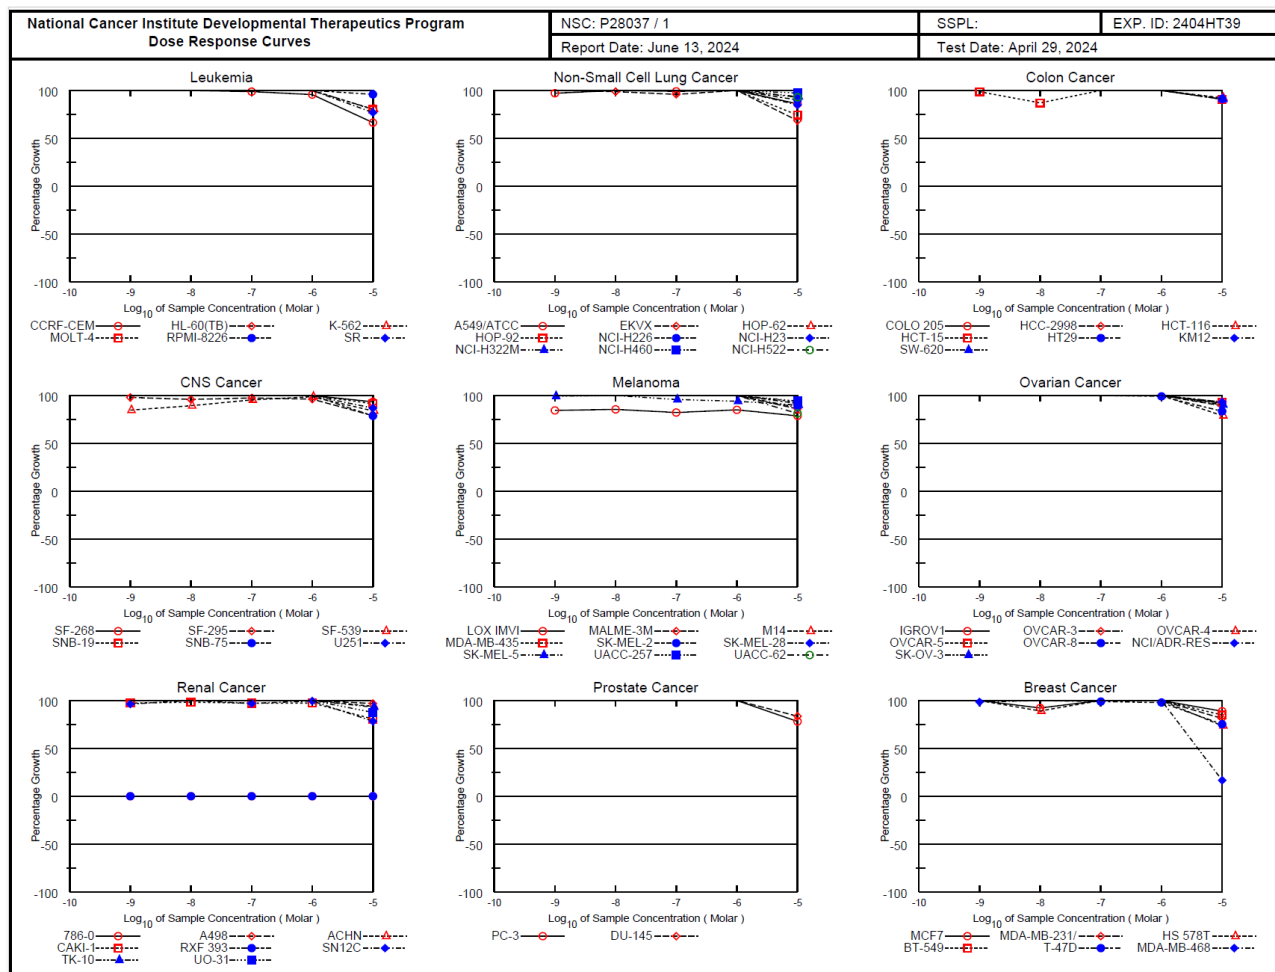

Figure S38. HTS384 NCI60 screen data for crinmodin bianthrone (1).

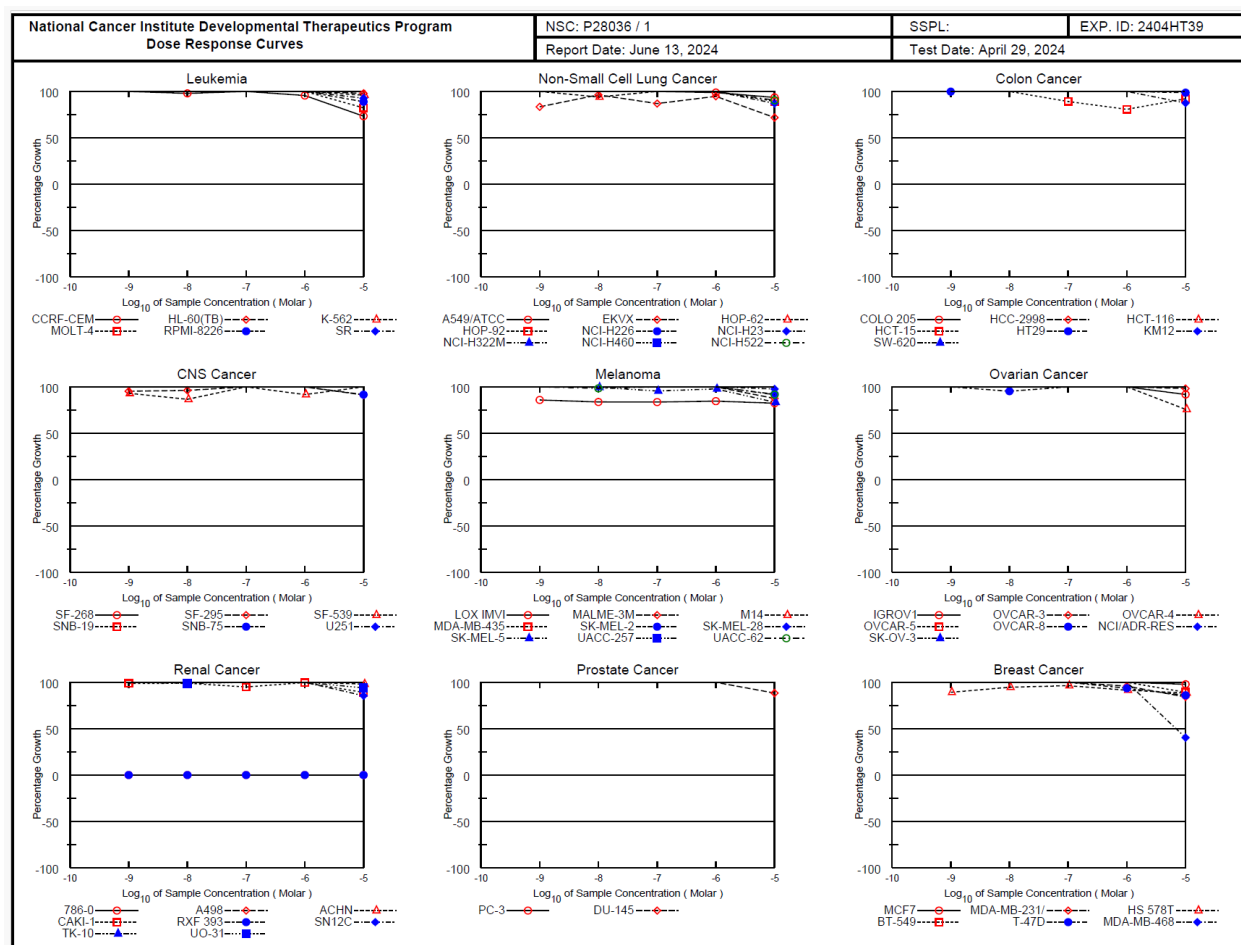

**Figure S39.** HTS384 NCI60 screen data for 1''-dehydrocrinmodin bianthrone (2).

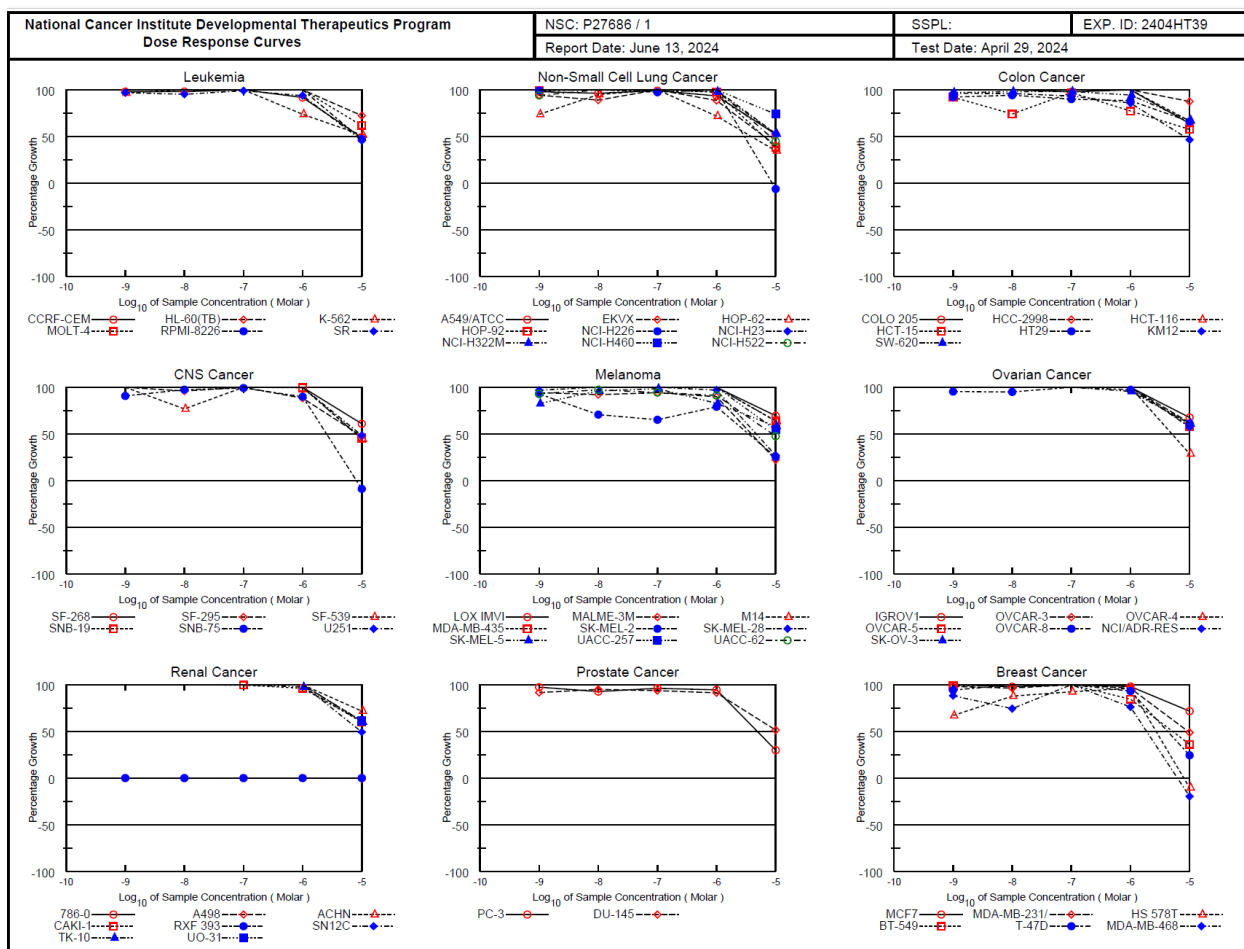

**Figure S40.** HTS384 NCI60 screen data for 1''-hydroxycrinemodin bianthrone (**3**).

**Table S1.** Reaction rates of **3** reacted with propionic anhydride using *R*- or *S*-HBTM catalysts. The reaction rate was achieved by measuring the peak areas for the fully acylated derivative, using the extracted ion chromatogram (EIC) for the sodiated molecule  $[M + Na]^+$  at  $m/z$  997.3617 ( $\pm 20$  ppm).

| Time (min) | <i>R</i> -HBTM (peak area) | <i>S</i> -HBTM (peak area) |
|------------|----------------------------|----------------------------|
| 5          | 5.16E+06                   | 3.63E+06                   |
| 10         | 1.26E+07                   | 8.05E+06                   |
| 15         | 1.98E+07                   | 1.12E+07                   |
| 20         | 2.43E+07                   | 1.53E+07                   |
| 25         | 3.10E+07                   | 1.89E+07                   |
| 30         | 3.40E+07                   | 2.13E+07                   |
| 35         | 3.82E+07                   | 2.40E+07                   |
| 40         | 4.20E+07                   | 2.49E+07                   |
| 45         | 4.42E+07                   | 2.81E+07                   |
| 50         | 4.80E+07                   | 2.97E+07                   |
| 55         | 5.09E+07                   | 3.26E+07                   |
| 60         | 5.33E+07                   | 3.47E+07                   |
